# Supplementary material for: A double-switch pHLIP system enables selective enrichment of circulating tumor microenvironment-derived extracellular vesicles
Source: PubMed Central journal article supplement — Proc Natl Acad Sci U S A. 2023 Jan 3;120(2):e2214912120. doi: 10.1073/pnas.2214912120 (PMC9926244; doi:10.1073/pnas.2214912120), 2023-01-03
Supplement: pnas.2214912120.sapp.pdf [file pnas.2214912120.sapp.pdf]

## Supporting Information for

A double-switch pHLIP system enables selective enrichment of circulating tumor microenvironment-derived extracellular vesicles

Zhiyou Zong, Xinzhuo Liu, Zhuo Ye and Dingbin Liu

Dingbin Liu

Email: liudb@nankai.edu.cn

### **This PDF file includes:**

- Supporting text
- Tables S1 to S10
- Figures S1 to S17
- Legends for Movies S1 to S2
- Legends for characterization of peptides
- SI References
- HPLC and MS of the peptides

### **Other supporting materials for this manuscript include the following:**

- Movies S1 to S2

## Supporting Information Text

### Methods

#### **pK calculations, molecular dynamics (MD) simulations, and interactional energy calculations**

Three-dimensional structures of WT pHLIP and hundreds of variants were built by SWISS-MODEL (<https://swissmodel.expasy.org/>) (1-5). The relevant pK values of peptides were calculated by H++ software of 3.2 version (<http://newbiophysics.cs.vt.edu/H++/index.php>) (6-8). WT pHLIP and four potential D-S variants were simulated to investigate the performance of hook-like switch II. The details of these molecular systems are provided in Supplementary Table 8. Each assembly was solvated in an equilibrated box of water. The overall charge neutrality was achieved by adding ions of Na<sup>+</sup>/Cl<sup>-</sup> to the solution. All molecular systems before production simulations should undergo appropriate pretreatments (9, 10). Herein, 5000 steps minimization and 100 ps MD simulation with the restraint of peptide were employed to equilibrate water. Then 5000 steps of minimization with 5 ns equilibration without restraint were carried out to equilibrate the whole system. The scalable program NAMD 2.14 (11) with the CHARMM36 force field (12-14), and the TIP3P water model (15) were employed to perform all the MD simulations. Visualization and analysis of the MD trajectories were carried out by the VMD program (16). The interaction energies were calculated using the two negatively-charged residues, i.e., D33 and E34, and the positively-charged residues, i.e., R11 and T28H in D-S v1, and R11, T28H and T18H in D-S v2.

#### **Free-energy calculations**

We performed free-energy calculations for the WT pHLIP and the two variants to quantify the barriers against forming hook-like structures by the well-tempered meta-eABF method (17).  $d$  denotes the center-of-mass distance between the two negatively-charged residues (D33 and E34) in the C-terminal and the positively-charged R11 near the N-terminal. Detail of each molecular assembly is provided in Supplementary Table 9.

## **Recording of fluorescence and circular dichroism (CD) spectra**

Peptides used in this study (see Supplementary Table 10 and characterization of peptides) were synthesized by GL Biochem (Shanghai, China) Ltd. Liposome preparation, Trp fluorescence measurements and CD experiments were carried out by reference to the works of An et al. and Andreev et al. (18, 19). The details are described below. A solution of 20 mg 1-palmitoyl-2-oleoyl-sn-glycero-3-phosphocholine (POPC) model membranes (Avanti Polar Lipids) in 0.8 mL of chloroform was dried in a small round-bottom flask in vacuo by a rotary evaporator. The dry lipid was rehydrated with 2 mL PBS (pH 7.4, 5 mM) for 30 min, and vortexed vigorously. Then the mixture was freeze-thawed 7 times by a dry-ice/ethanol bath ( $-70^{\circ}\text{C}$ ) and extruded 15 passages through a polycarbonate membrane with 100 nm-sized pores by an Avanti Mini-Extruder (Avestin, Canada). All the experiments were carried out at room temperature. The lyophilized powder of peptides was dissolved by PBS (pH 7.4, 5 mM) and put at room temperature for 24 h. Then 5  $\mu\text{M}$  peptides were incubated with POPC at pH 7.4 for 2 h with a pHLIP to lipid ratio of 1:260. The pH condition of each system was further changed for Trp fluorescence measurements. Trp residues were excited at 295 nm. The fluorescence emission spectra were collected from 310-450 nm by the fluorescence spectrophotometer (Hitachi, Japan). The widths of the excitation and emission slits were set to 2.5 and 5 nm, respectively. The  $pK_a$  for WT pHLIP was calculated by the Henderson-Hasselbalch equation (18). Additionally, the samples with different pH conditions were further analyzed by CD (BioLogic, France). Hydrophobic properties of the peptides were analyzed by ProtScale (<https://web.expasy.org/protscale/>).

## **Cellular Experiments**

Human lung and breast cancer cells, i.e., A549 and MDA-MB-231, were obtained from the Shanghai Institute of Life Sciences, Chinese Academy of Sciences. All the in-vitro experiments regarding cells and EVs were carried out on the sterile ultra-clean table. In the cell experiments, A549 cells were cultivated overnight at  $37^{\circ}\text{C}$

in a confocal dish with 1 mL Dulbecco's modified essential medium (DMEM; Wisent, Canada) supplemented with 10% heat-inactivated fetal bovine serum (FBS) (Wisent, Canada) and 1% penicillin-streptomycin (Gibco-Life Technologies, Grand Island, NY). After removing the supernatant, fresh 1 mL DMEM was added with 5  $\mu$ M peptides@biotin. Then three pH conditions, i) pH 7.4, ii) pH 7.4 $\rightarrow$ 6.2 (WT pHLIP)/6.8 (D-S v1), and iii) pH 7.4 $\rightarrow$ 6.2 (WT pHLIP)/6.8 (D-S v1) $\rightarrow$ 7.4 were employed to treat the systems. After changing pH, the peptides were incubated with the cells for 0.5 h in the fresh DMEM, wherein the cells kept growing. Excess peptides@biotin were removed by washing the cell three times using PBS (pH 7.4 for i) and iii), and pH 6.2 (WT pHLIP)/6.8 (D-S v1) for ii)). Then FITC@SA was added into the supernatant and used to specifically link with peptides@biotin via biotin-streptavidin interactions (similarly hereinafter). After washing off the excess FITC@SA using PBS with relevant pH, the cell nuclei were stained with DAPI (blue fluorescence) after immobilization.

In the EV experiments, peptides@biotin were incubated with 1 mL supernatant of A549 cells that were cultivated overnight, which then underwent the pH treatments of 7.4 $\rightarrow$ 6.2 (WT pHLIP)/6.8 (D-S v1) $\rightarrow$ 7.4. Subsequently, FITC@SA was added into the supernatants to link with peptides@biotin. Dil was further employed to stain the EV membranes. All the pH changes and buffer substitutions regarding EV experiments were carried out by 100 KDa ultrafiltration centrifugal tube. Confocal microscopy (Nikon, Japan) was used to measure the fluorescence for different systems. The results of particle size and concentration of EVs were obtained by nanoparticle tracking analysis (NTA; Malvern, UK). Transmission electron microscope (TEM; Hitachi, Japan) was employed to observe the morphological characteristics of EVs. ImageJ software (<https://imagej.en.softonic.com>) was used to analyze the fluorescence intensity. The cell viability and toxicity experiments were performed using Cell Counting Kit-8 and MTT assay kit respectively, according to the instructions of the manufacturer.

### ***In vivo* experiments**

Nude mice, 5-6 weeks of age, were purchased from Beijing Vital River Laboratory Animal Technology Co. Ltd. All animal studies were performed in compliance with the guidelines set by the Tianjin Committee of Use and Care of Laboratory Animals and the overall project protocols were approved by the Animal Ethics Committee of Nankai University. The accreditation number of the laboratory is SYXK(Jin) 2019-0003 promulgated by the Tianjin Science and Technology Commission. After  $10^6$  lung and breast cancer cells implanting into mice, tumor was formed within three weeks. In the *in vivo* imaging experiments, D-S v1@Cy5.5 (400  $\mu\text{g}/\text{kg}$ ) was intraperitoneally (i.p.) injected into the tumor model mice and imaged after 24 h. In the RNA detection experiments, peptides@biotin (2 mg/kg) was i.p. injected into the opposite side of adenocarcinoma. The whole blood samples were collected at different time points, placed 1.5 h, and then centrifuged at 1000g for 15 min at 4 °C to obtain blood serum. The cTME-EVs tagged by peptides@biotin were collected from the serum by 2  $\mu\text{m}$  MB@SA using magnetic separation. The RNA concentrations of the samples were detected by miRNeasy Serum/Plasma Kit (QIAGEN), according to the instructions of the manufacturer. Given the RNA detection results, samples obtained at 24 h post injection were used for subsequent experiments. Furthermore, the mice in the RNA detection experiments were dissected and the relevant organs were imaged *ex vivo*.

In FCM experiments, the samples were incubated with 2  $\mu\text{L}$  antibodies (PE-labeled CD63 and Alexa Fluor 700-labeled EpCAM, 0.1  $\mu\text{g}/\mu\text{L}$ ) in 300  $\mu\text{L}$  PBS (pH 7.4) with rotation at 4 °C for 30 min. The samples were added to a 12  $\times$  75 mm polypropylene round-bottom flow tube and run at a medium speed. The FCM studies were performed on a BD LSR Fortessa analyzer (Becton, Dickinson and Company). All the data were acquired and analyzed by the BD FACSDiva and FlowJo software (<https://www.flowjo.com/>). In western-blot (WB) assays, the samples were lysed by ice-cold RIPA buffer (Beyotime Biotechnology) with a protease inhibitor (PMSF, 1 mM, Beyotime Biotechnology) for 30 min. The lysates were centrifuged at 14,000g for 20 min for collecting supernatant. Then the samples were separated by SDS-PAGE and transferred onto a 0.45  $\mu\text{m}$  nitrocellulose

membrane (Millipore). Membranes were further blocked by 5% skim milk (in TBST, 20 mM Tris-HCl, 150 mM NaCl, and 0.05% Tween-20) at 37 °C for 1 h before primary-antibody incubation. Subsequently, the antibodies against the following proteins were used for WB experiments: anti-CD63 (1:1000, Proteintech, 25682-1-AP), anti-EpCAM (1:1000, Beyotime, AF1603), anti-Alix (1:1000, Beyotime, ET1705-74), and anti-CD9 (1:1000, Beyotime, AF1192). HRP-linked anti-rabbit-IgG antibody (1:3000, Beyotime, A0208) was used as secondary antibodies. The membranes were incubated with primary antibodies overnight at 4 °C, then washed three times using TBST, and incubated with secondary antibodies for 2 h at room temperature. The membranes were further washed every ten minutes by TBST (three times), incubated with BeyoECL Plus (Beyotime Biotechnology), and imaged by Azure c600 (Azure Biosystems, USA). The particle size and concentration of EVs in the serum were analyzed by NTA (Malvern, UK).

### **Transcriptome**

The samples of the D-S v1 group were obtained as described in tissue experiments. In the ultracentrifugation (UC) group, the obtained serum samples were centrifuged at 10,000 g for 30 min. The supernatants were centrifuged by UC (110,000 g for 90 min, Beckman Coulter, Optima™ MAX-XP, USA). The obtained pellets were resuspended in PBS (pH 7.4, 5 mM) and centrifuged again by UC (110,000 g for 90 min). Finally, the yielded pellets were dispersed in PBS (pH 7.4, 5 mM). The particle sizes, concentrations, and morphological features of these EVs were characterized by NTA and TEM, respectively (Supplementary Fig. 8). RNA sequencing and analysis were performed by LC–Bio Technology co., Ltd. (Hangzhou, China).  $q < 0.05$  and a fold change (FC)  $> 2$  are used to define upregulation and downregulation genes, while gray ones are not significant. Protein-protein interaction (PPI) network of DEGs and the filtered top ten hub genes from PPI were analyzed by Cytoscape (<https://cytoscape.org/>) (20).

## Tables S1-10

**Table S1. pK values of D25 (pK25) in virtual variants.**

| L21 <sup>a</sup> | pK25  | L22 <sup>a</sup> | pK25  | L26 <sup>a</sup> | pK25  | L28 <sup>a</sup> | pK25  |
|------------------|-------|------------------|-------|------------------|-------|------------------|-------|
| WT               | 4.261 | WT               | 4.261 | WT               | 4.261 | WT               | 4.261 |
| L21A             | 4.238 | L22A             | 4.237 | L26A             | 4.298 | L28A             | 4.222 |
| L21R             | 4.672 | L22R             | 4.241 | L26R             | 4.251 | L28R             | 4.315 |
| L21N             | 4.222 | L22N             | 4.275 | L26N             | 4.338 | L28N             | 4.168 |
| L21D             | 4.193 | L22D             | 4.161 | L26D             | 4.240 | L28D             | 4.210 |
| L21C             | 4.224 | L22C             | 4.173 | L26C             | 4.209 | L28C             | 4.191 |
| L21Q             | 4.255 | L22Q             | 4.176 | L26Q             | 4.272 | L28Q             | 4.407 |
| L21E             | 4.234 | L22E             | 4.460 | L26E             | 4.260 | L28E             | 4.274 |
| L21G             | 4.236 | L22G             | 4.513 | L26G             | 4.245 | L28G             | 4.231 |
| L21H             | 4.471 | L22H             | 4.270 | L26H             | 4.280 | L28H             | 4.252 |
| L21I             | 4.289 | L22I             | 4.251 | L26I             | 4.253 | L28I             | 4.290 |
| L21K             | 4.339 | L22K             | 4.222 | L26K             | 4.277 | L28K             | 4.295 |
| L21M             | 4.275 | L22M             | 4.189 | L26M             | 4.239 | L28M             | 4.249 |
| L21F             | 4.539 | L22F             | 4.275 | L26F             | 4.250 | L28F             | 4.276 |
| L21P             | 4.278 | L22P             | 4.186 | L26P             | 4.069 | L28P             | 4.283 |
| L21S             | 4.234 | L22S             | 4.172 | L26S             | 4.224 | L28S             | 4.163 |
| L21T             | 4.268 | L22T             | 4.364 | L26T             | 4.277 | L28T             | 4.204 |
| L21W             | 4.489 | L22W             | 4.338 | L26W             | 4.258 | L28W             | 4.258 |
| L21Y             | 4.539 | L22Y             | 4.266 | L26Y             | 4.258 | L28Y             | 4.252 |
| L21V             | 4.288 | L22V             | 4.230 | L26V             | 4.233 | L28V             | 4.285 |

<sup>a</sup> Site of virtual mutation.

**Table S2. pK values of D14 (pK14) in virtual variants.**

| A10 <sup>a</sup> | pK14  | R11 <sup>a</sup> | pK14  | W15 <sup>a</sup> | pK14  | F17 <sup>a</sup> | pK14  | T18 <sup>a</sup> | pK14  | T19 <sup>a</sup> | pK14  |
|------------------|-------|------------------|-------|------------------|-------|------------------|-------|------------------|-------|------------------|-------|
| WT               | 3.873 |
| A10G             | 3.868 | R11G             | 3.860 | W15A             | 3.822 | F17A             | 3.856 | T18A             | 4.140 | T19A             | 3.888 |
| A10V             | 3.883 | R11A             | 3.880 | W15R             | 4.188 | F17R             | 3.829 | T18R             | 3.410 | T19R             | 3.882 |
| A10L             | 3.888 | R11V             | 3.874 | W15N             | 4.322 | F17N             | 3.806 | T18N             | 4.013 | T19N             | 3.976 |
| A10I             | 3.877 | R11L             | 3.842 | W15D             | 3.909 | F17D             | 3.742 | T18D             | 4.216 | T19D             | 3.907 |
| A10P             | 3.784 | R11I             | 3.827 | W15C             | 3.837 | F17C             | 3.812 | T18C             | 4.050 | T19C             | 3.940 |
| A10F             | 3.967 | R11P             | 3.841 | W15Q             | 4.133 | F17Q             | 3.821 | T18Q             | 4.752 | T19Q             | 3.857 |
| A10Y             | 3.902 | R11F             | 3.792 | W15E             | 3.728 | F17E             | 3.792 | T18E             | 4.376 | T19E             | 3.873 |
| A10W             | 4.015 | R11Y             | 3.887 | W15G             | 3.790 | F17G             | 3.835 | T18G             | 4.046 | T19G             | 3.996 |
| A10S             | 3.810 | R11W             | 3.861 | W15H             | 3.824 | F17H             | 3.894 | T18H             | 4.707 | T19H             | 3.873 |
| A10T             | 3.857 | R11S             | 3.872 | W15I             | 3.892 | F17I             | 3.863 | T18I             | 4.310 | T19I             | 3.904 |
| A10C             | 3.758 | R11T             | 3.848 | W15L             | 3.899 | F17L             | 3.867 | T18L             | 4.271 | T19L             | 3.908 |
| A10M             | 3.860 | R11C             | 3.873 | W15K             | 4.153 | F17K             | 3.866 | T18K             | 4.425 | T19K             | 3.855 |
| A10N             | 3.877 | R11M             | 3.894 | W15M             | 3.867 | F17M             | 3.838 | T18M             | 4.253 | T19M             | 3.897 |
| A10Q             | 3.803 | R11N             | 3.939 | W15F             | 3.902 | F17P             | 3.967 | T18F             | 4.658 | T19F             | 3.879 |
| A10D             | 3.864 | R11Q             | 3.886 | W15P             | 3.497 | F17S             | 3.935 | T18P             | 4.272 | T19P             | 3.790 |
| A10E             | 3.744 | R11E             | 3.828 | W15S             | 4.255 | F17T             | 3.822 | T18S             | 3.733 | T19S             | 3.838 |
| A10K             | 3.774 | R11D             | 3.798 | W15T             | 3.692 | F17W             | 3.860 | T18W             | 4.294 | T19W             | 3.880 |
| A10R             | 3.854 | R11K             | 3.899 | W15Y             | 3.978 | F17Y             | 3.865 | T18Y             | 4.492 | T19Y             | 3.876 |
| A10H             | 3.959 | R11H             | 3.871 | W15V             | 3.856 | F17V             | 3.883 | T18V             | 4.300 | T19V             | 3.883 |

<sup>a</sup> Site of virtual mutation.



**Table S3. Multiple mutation strategies for increasing pK25.**

| Variant        | pK25  | Variant        | pK25  |
|----------------|-------|----------------|-------|
| L21F/L22G      | 5.068 | L21F/L22W      | 4.642 |
| L21F/L22T      | 5.025 | L21Y/L22G      | 4.382 |
| L21Y/L22W      | 4.684 | L21Y/L22T      | 4.410 |
| L21W/L22G      | 4.419 | L21W/L22W      | 4.812 |
| L21W/L22T      | 4.654 | L21H/L22G      | 4.437 |
| L21H/L22W      | 4.495 | L21H/L22T      | 4.412 |
| L21F/L26N      | 4.675 | L21W/L26N      | 4.856 |
| L21Y/L26N      | 4.651 | L22G/L26N      | 4.431 |
| L22T/L26N      | 4.310 | L22W/L26N      | 4.519 |
| L21F/L22W/L26N | 5.014 | L21W/L22T/L26N | 5.199 |
| L21Y/L22W/L26N | 5.063 |                |       |

**Table S4. Microscale increments of pK25 and pK14, a summary for the above single and multiple mutations.**

| Peptide        | pK25               | Peptide | pK14               |
|----------------|--------------------|---------|--------------------|
| WT             | 4.261              | WT      | 3.873              |
| L22T           | 4.364              | A10Y    | 3.902 <sup>a</sup> |
| L21W           | 4.489              | A10W    | 4.015 <sup>b</sup> |
| L21F           | 4.539              | W15Q    | 4.133              |
| L21Y           | 4.539              | T18A    | 4.140              |
| L21F/L22W      | 4.642              | T18M    | 4.253              |
| L21Y/L26N      | 4.651              | W15S    | 4.255              |
| L21W/L22T      | 4.654              | T18L    | 4.271              |
| L21F/L26N      | 4.675              | T18P    | 4.272              |
| L21Y/L22W      | 4.684              | T18W    | 4.294              |
| L21W/L22W      | 4.812              | T18V    | 4.300              |
| L21W/L26N      | 4.856              | T18I    | 4.310 <sup>c</sup> |
| L21F/L22W/L26N | 5.014              | T18K    | 4.425              |
| L21F/L22G      | 5.068 <sup>d</sup> | T18Y    | 4.492              |
| L21W/L22T/L26N | 5.199              | T18F    | 4.658              |
|                |                    | T18H    | 4.707              |
|                |                    | T18Q    | 4.752              |

<sup>a</sup> Around pK value of 3.9, there are four alternative variants, i.e., W15F (3.902), T19G (3.907), T19I (3.904), and T19L (3.908).

<sup>b</sup> Around pK value of 4.0, there are two alternative variants, i.e., T18N (4.013) and T18G (4.046).

<sup>c</sup> Around pK value of 4.3, there is one alternative variants, i.e., W15N (4.322).

<sup>d</sup> Around pK value of 5.0, there is one alternative variants, i.e., L21Y/L22W/L26N (5.063).

**Table S5. pK values of ionizable residues in variants.**

| Variant                  | pK3 <sup>a</sup> | pK14  | pK25               | pK28 <sup>a</sup> | pK31 <sup>a</sup> | pK33 <sup>a</sup> | pK34 <sup>a</sup> |
|--------------------------|------------------|-------|--------------------|-------------------|-------------------|-------------------|-------------------|
| L28H                     | 4.429            | 3.773 | 4.252              | 6.563             | 4.241             | 3.976             | 4.244             |
| L28H/D31A                | 4.443            | 3.751 | 4.241              | 6.583             | -                 | 3.939             | 4.242             |
| L28H/D31A/L21F/L22G/T18Q | 4.461            | 4.080 | 4.819 <sup>b</sup> | 6.605             | -                 | 4.199             | 4.246             |
| L28H/D31A/L21W/L22W/T18Q | 4.461            | 4.142 | 4.436              | 6.606             | -                 | 4.195             | 4.241             |
| L28H/D31A/L21F/L22G      | 4.464            | 3.767 | 4.804 <sup>b</sup> | 6.602             | -                 | 4.199             | 4.248             |
| L28H/D31A/L21W/L22W      | 4.463            | 3.794 | 4.357              | 6.603             | -                 | 4.201             | 4.243             |
| L28H/D31A/L21F/L22G/T18F | 4.473            | 4.137 | 4.791 <sup>b</sup> | 6.592             | -                 | 3.767             | 4.282             |
| L28H/D31A/L21F/L22G/T18H | 4.470            | 4.205 | 4.745 <sup>b</sup> | 6.595             | -                 | 3.791             | 4.276             |
| L28H/D31A/L21W/L22T/L26N | 4.469            | 3.781 | 4.405              | 6.581             | -                 | 3.762             | 4.273             |

<sup>a</sup> pK3, pK28, pK31, pK33 and pK34 denote the pK values of E3, L28H, D31, D33 and E34, respectively.

<sup>b</sup> Promising pK value.

**Table S6. Traceable top 50 DEGs<sup>a</sup> in the D-S v1 group and their potential cell sources<sup>b</sup>.**

| DEG                         | Cell type                                                                                                                |
|-----------------------------|--------------------------------------------------------------------------------------------------------------------------|
| Alb                         | Brain cancer cells, fibroblasts, mast cells, and mov neuroglial cells                                                    |
| Trf                         | Brain cancer cells and mast cells                                                                                        |
| Mup family <sup>c</sup>     | Mast cells                                                                                                               |
| Aldo family <sup>d</sup>    | Basophilic leukemia cells, macrophages, mast cells, microglia, neural stem cells, oligodendrocytes, and pancreatic cells |
| Apo family <sup>e</sup>     | Mast cells and oligodendrocytes                                                                                          |
| Serpina family <sup>f</sup> | Brain cancer cells                                                                                                       |
| Gm family <sup>g</sup>      | Mast cells, embryonic fibroblasts, and oligodendrocytes                                                                  |
| Mug1                        | Mast cells                                                                                                               |
| Dnah family <sup>h</sup>    | Fibroblasts                                                                                                              |
| Ltbp family <sup>i</sup>    | Mast cells and fibroblasts                                                                                               |
| Myo family <sup>j</sup>     | Macrophages                                                                                                              |
| Lama family <sup>k</sup>    | Fibroblasts                                                                                                              |
| Col6 family <sup>l</sup>    | Embryonic fibroblasts, fibroblasts, and mast cells                                                                       |
| Wdr family <sup>m</sup>     | Mast cells                                                                                                               |
| Nefm                        | Pancreatic cells                                                                                                         |
| Mgat5b                      | Fibroblasts                                                                                                              |

<sup>a</sup> In the following annotations, genes obtained by the D-S pHLIP-based platform are emphasized in bold.

<sup>b</sup> Top DEGs were matched to exosome biomarker database, ExoCarta (<http://exocarta.org/index.html>).

<sup>c</sup> **Mup7** and **Mup22** are not included in ExoCarta, but Mup family, for instance Mup1 and Mup5 are traceable.

<sup>d</sup> **Aldob** is not included in ExoCarta, but Aldo family, for instance Aldoa and Aldoc are traceable.

<sup>e</sup> **Apoe** is traceable, but **Apoa1** and **Apoa2** are not included in ExoCarta. Another gene in Apo family, Apom is traceable.

<sup>f</sup> **Serpina1a** is traceable, but **Serpina1c** and **Serpina3k** are not included in ExoCarta.

<sup>g</sup> **Gm26391**, **Gm34354**, and **Gm10717** are not included in ExoCarta, but many genes in Gm family are traceable.

<sup>h</sup> **Dnah1**, **Dnah9**, and **Dnah14** are not included in ExoCarta, but Dnah family, for instance Dnah10 is traceable.

<sup>i</sup> **Ltbp2** is not included in ExoCarta, but Ltbp family, for instance Ltbp1 and Ltbp4 are traceable.

<sup>j</sup> **Myo5b** is not included in ExoCarta, but Myo family, for instance Myo1c and Myo1g are traceable.

<sup>k</sup> **Lama1** is not included in ExoCarta, but Lama family, for instance Lama5 is traceable.

<sup>l</sup> **Col6a4** is not included in ExoCarta, but Col6a family, for instance Col6a1 and Col6a2 is traceable.

<sup>m</sup> **Wdr54** is not included in ExoCarta, but many genes in Wdr family are traceable.

**Table S7. Traceable top 50 DEGs<sup>a</sup> in the UC group and their potential cell sources<sup>b</sup>.**

| DEG                       | Cell type                                                                                                           |
|---------------------------|---------------------------------------------------------------------------------------------------------------------|
| Gm family <sup>c</sup>    | Mast cells, embryonic fibroblasts, and oligodendrocytes                                                             |
| Eef1a1                    | Dendritic cells, fibroblasts, macrophages, mast cells, mov neuroglial cells, oligodendrocytes, and pancreatic cells |
| Atp family <sup>d</sup>   | Mast cells, fibroblasts, macrophages, and pancreatic cells                                                          |
| Mid1                      | Mast cells                                                                                                          |
| Hba-a1                    | Mast cells                                                                                                          |
| Hbb-b family <sup>e</sup> | Mast cells                                                                                                          |
| Pla2g family <sup>f</sup> | Mast cells and basophilic leukemia cells                                                                            |
| Erdr1                     | Mast cells                                                                                                          |
| Fabp family <sup>g</sup>  | Basophilic leukemia cells, mast cells, neural stem cells, and oligodendrocytes                                      |

<sup>a</sup> In the following annotations, genes obtained in the UC group are emphasized in bold.

<sup>b</sup> Top DEGs were matched to exosome biomarker database, ExoCarta (<http://exocarta.org/index.html>).

<sup>c</sup> **Gm25018**, **Gm22291**, **Gm26391**, **Gm25212**, **Gm28661**, **Gm28437**, **Gm29216**, **Gm28439**, **Gm10925**, **Gm47283** and **Gm49405** are not included in ExoCarta, but many genes in Gm family are traceable.

<sup>d</sup> Many genes in **Atp8** and **Atp6** families are traceable.

<sup>e</sup> **Hbb-bs** is not included in ExoCarta, but Hbb-b1 and HBB-b2 are traceable.

<sup>f</sup> **Pla2g4b** is not included in ExoCarta, but Pla2g6 and Pla2g1b are traceable.

<sup>g</sup> **Fabp4** is not included in ExoCarta, but Fabp5 is traceable.

**Table S8. Simulation details of the molecular assemblies examined in this study.**

| No. | Molecular assembly | Number of atom | Size of the simulation box ( $\text{\AA}^3$ ) <sup>a</sup> | Simulation time (ns) |
|-----|--------------------|----------------|------------------------------------------------------------|----------------------|
| 1   | WT pHLIP           | 19,810         | 50×51×58                                                   | 100                  |
| 2   | D-S v1             | 19,489         | 50×51×58                                                   | 100                  |
| 3   | D-S v2             | 19,486         | 50×51×58                                                   | 100                  |
| 4   | D-S v3             | 19,498         | 50×51×58                                                   | 100                  |
| 5   | D-S v4             | 19,486         | 50×51×58                                                   | 100                  |

<sup>a</sup> Size of the water boxes guarantees a minimum distance of 15  $\text{\AA}$  from any atom of the peptide to any edge of the simulation box.

**Table S9. Free-energy calculations for the molecular assemblies of WT pHLIP, D-S v1, and D-S v2.**

| No. | Molecular assembly | Number of atom | Size of the simulation box ( $\text{\AA}^3$ ) <sup>a</sup> | Simulation time (ns) |
|-----|--------------------|----------------|------------------------------------------------------------|----------------------|
| 1   | WT pHLIP           | 48,886         | 72×69×104                                                  | 200                  |
| 2   | D-S v1             | 43,723         | 81×75×77                                                   | 200                  |
| 3   | D-S v2             | 43,492         | 76×75×82                                                   | 200                  |

<sup>a</sup> Size of the water boxes guarantees a minimum distance of 25 Å from any atom of the peptide to any edge of the simulation box.

**Table S10. Peptide sequences synthesized in this study.**

| Peptide  | Sequence <sup>a</sup>                |
|----------|--------------------------------------|
| WT pHLIP | GGEQNPIYWARYADWLFITPPLLLDLALLVDADEGT |
| D-S v1   | GGEQNPIYWARYADWLFITPFGLLDLAHLVADEGT  |
| D-S v2   | GGEQNPIYWARYADWLFHTPFGLLDLAHLVADEGT  |

<sup>a</sup> The mutation sites in D-S v1 and D-S v2 are highlighted in red.



## Figs. S1-17

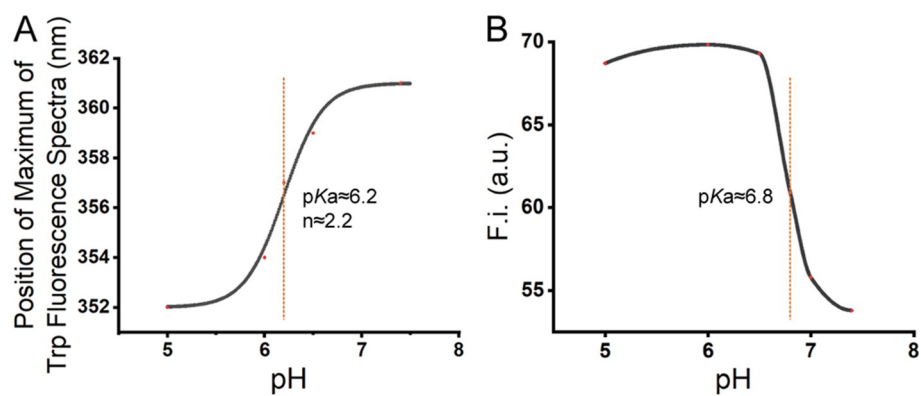

**Fig. S1** pKa calculations. (A) pKa value and hill coefficient ( $n$ ) of WT pHLIP calculated by Henderson-Hasselbalch equation. (B) pKa value of D-S v1 fitted by the curve fitting tool (Shape-preserving, PCHIP) in MATLAB (2018b version, MathWorks. Inc, USA).

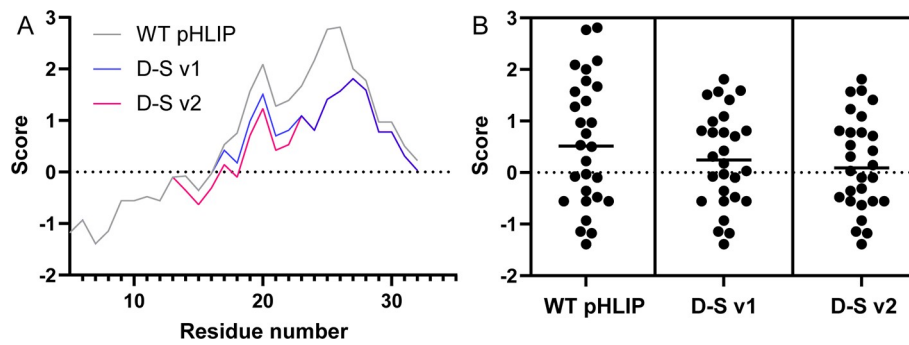

**Fig. S2** Hydrophobicity analysis. (A) Hydrophobicity scores of each residue. (B) Hydrophobicity scores for WT pHLIP, D-S v1, and D-S v2. The score is positively associated with hydrophobicity. The transverse lines in (B) denote the mean hydrophobic values for the three peptides.

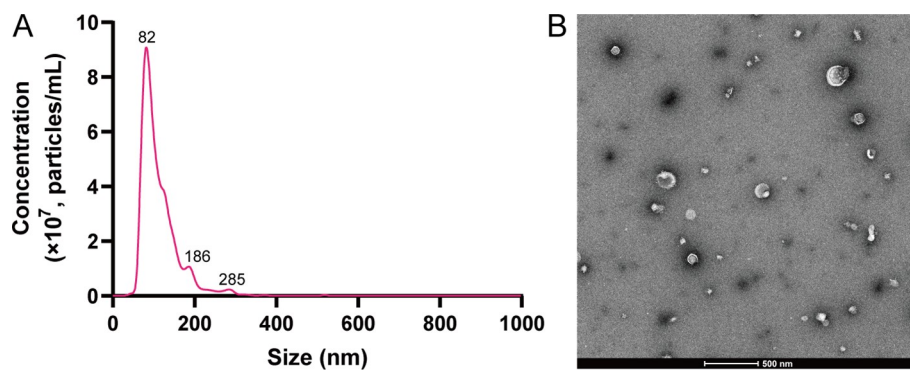

**Fig. S3** Characterizations for EVs derived from A549 cells. (A) NTA. (B) TEM.

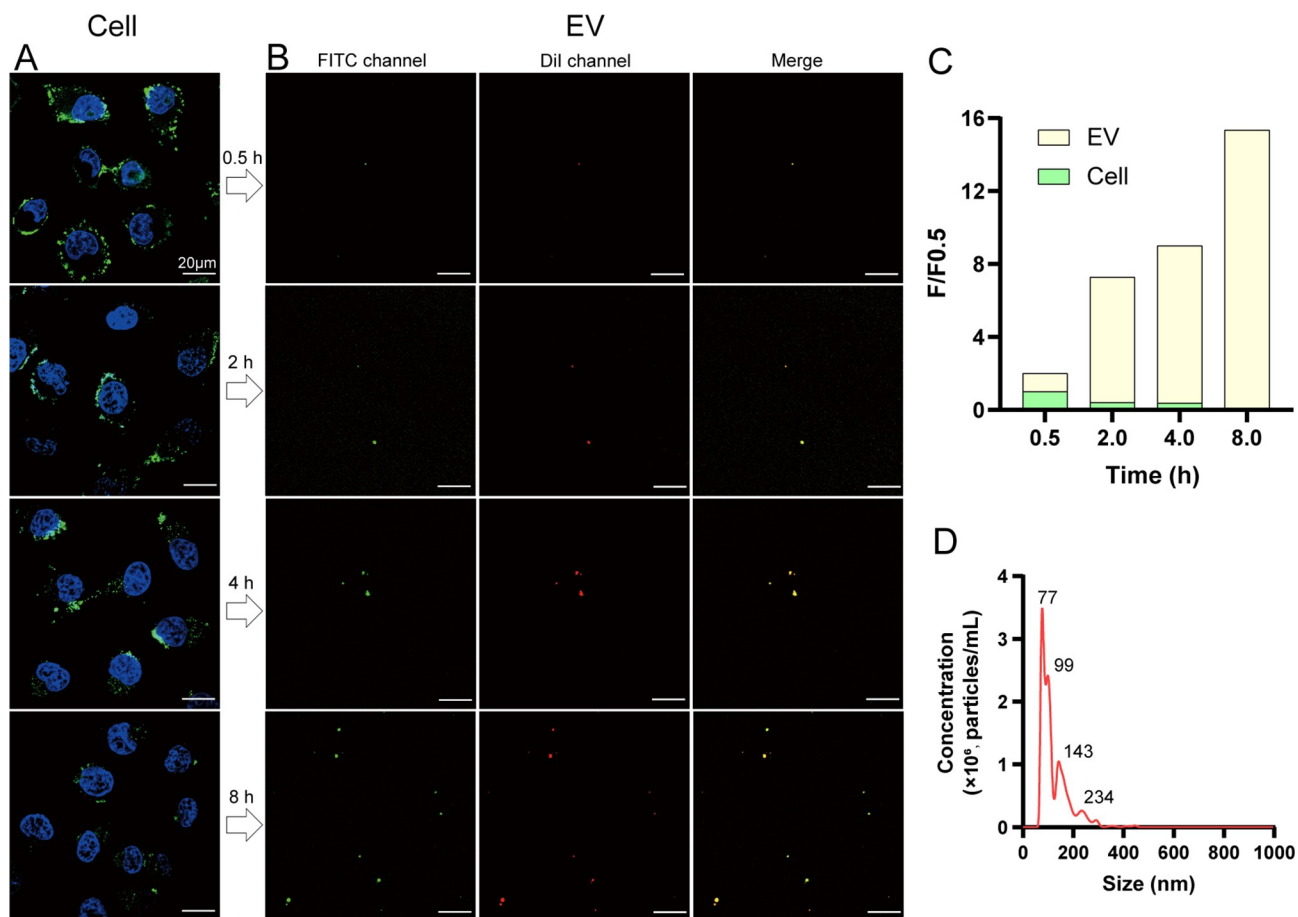

**Fig. S4** FITC signals in cells and their secreted EVs with time course. (A) Cell experiments. The green fluorescence of FITC in denotes the D-S v1 on cell surfaces. (B) EV experiments. EVs were dyed by Dil. The merged yellow signals detected in the supernatants suggest that the peptides on cells have transferred to their secreted EVs. (C) Time course of the changes in green fluorescence in cell surface and the merged yellow fluorescence, respectively. (D) NTA results for the produced EVs.

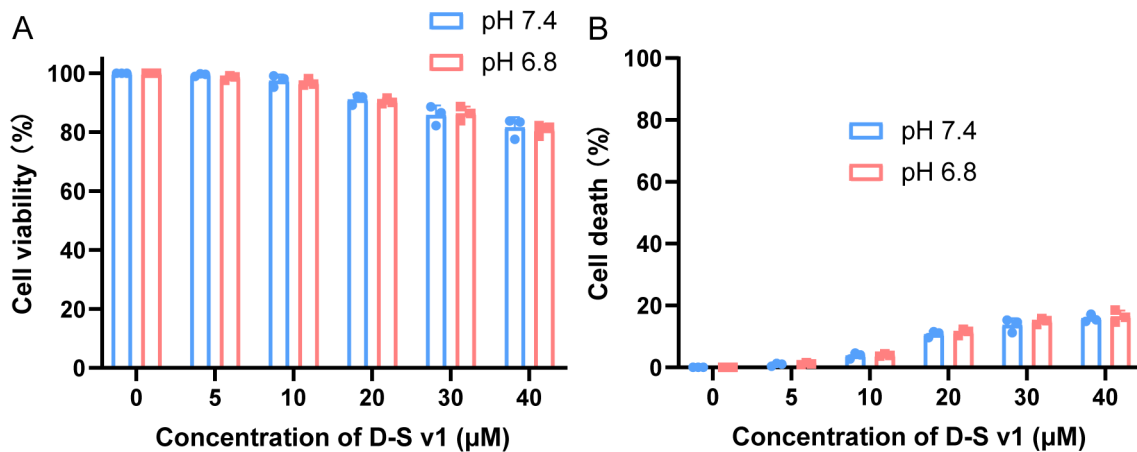

**Fig. S5** Cell viability (A) and cytotoxicity (B) tests for D-S pHLIP at different concentrations under pH 7.4 and pH 6.8 conditions. Cell Counting Kit-8 and MTT assay kits were employed to measure the cell viability and cytotoxicity, respectively, according to the manufacturer's instructions. The cells grew well below 10 µM and showed minimal cytotoxicity (< 4%) under both pH conditions.

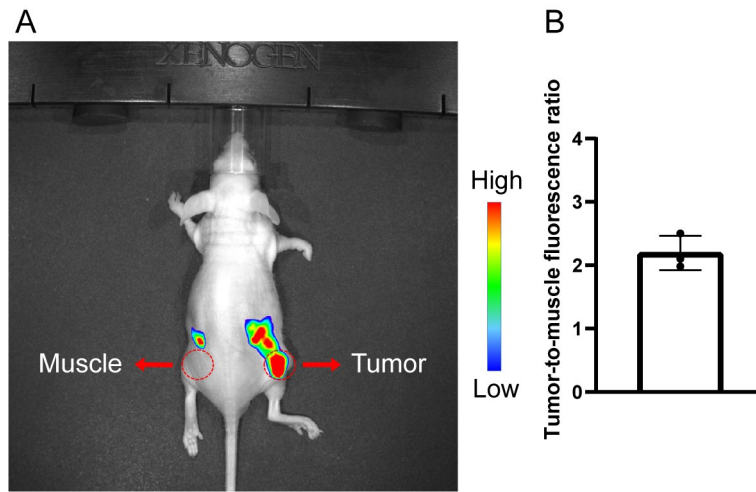

**Fig. S6** *In vivo* fluorescence imaging of D-S v1 conjugated by Cy5.5 (D-S v1@Cy5.5). (A) Fluorescent image of the tumor-bearing mouse which was i.p. injected with D-S v1@Cy5.5. (B) Measurement of the tumor-to-muscle fluorescence ratios. D-S v1@Cy5.5 was i.p. injected into tumor model mice and the fluorescence on the tumor and non-tumor sites was imaged at 24 h post injection to calculate the tumor-to-muscle fluorescence ratios. The results are expressed as mean  $\pm$  SEM (n = 3 biological replicates).

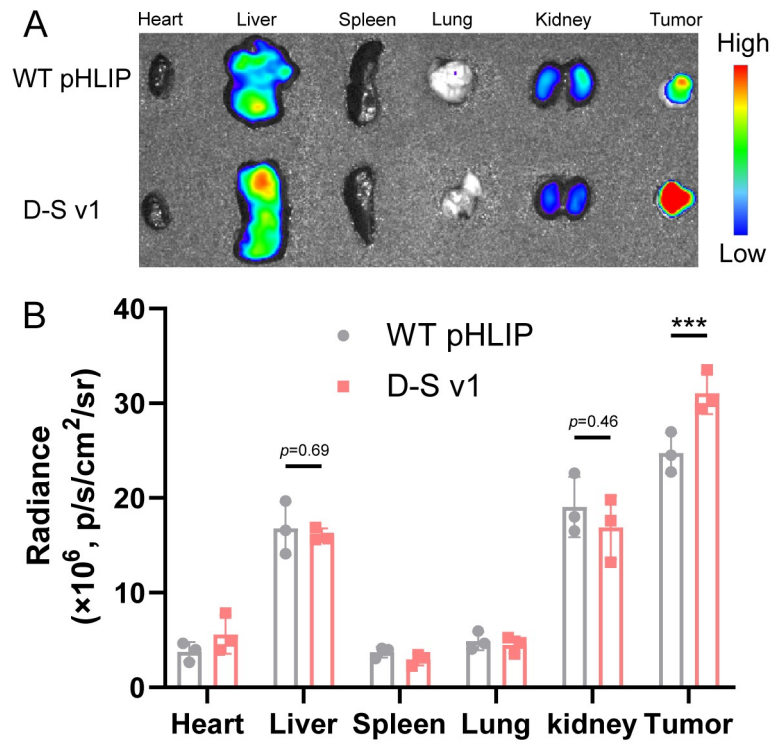

**Fig. S7** Distribution of WT pHLIP and D-S v1 in major organs. (A) Organ imaging. The mice, whose sera were withdrawn at 24 h time point, were dissected. The organs were incubated with FITC@SA (1  $\mu\text{g/mL}$ ) for 10 min, and washed three times using PBS (pH 6.2 and 7.4 for WT pHLIP and D-S v1 groups, respectively). The FITC signals in show that the peptides are distributed in the tumor, liver, and kidney. (B) Quantified results. D-S v1 possesses a higher tumor-accumulation ability than WT pHLIP. Additionally, the peptides were metabolized mainly through the liver and kidney. The results are expressed as mean  $\pm$  SEM ( $n = 3$  biological replicates). \*\*\* $p < 0.001$ .

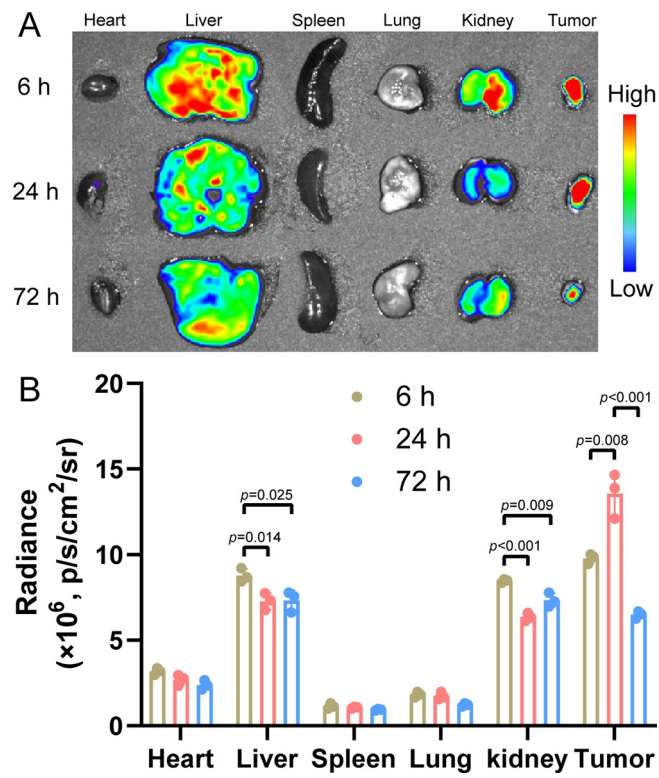

**Fig. S8** Dynamic distribution of D-S v1 in major organs at different time points. (A) Fluorescent imaging of the organs at 6 h, 24 h, and 72 h. (B) Quantification results for the fluorescence intensities in (A). The organs obtained at different time points were first incubated with FITC@SA (1  $\mu\text{g}/\text{mL}$ ) for 10 min and then washed three times using PBS. The results are expressed as mean  $\pm$  SEM (n = 3 biological replicates). \*\*\*p<0.001.



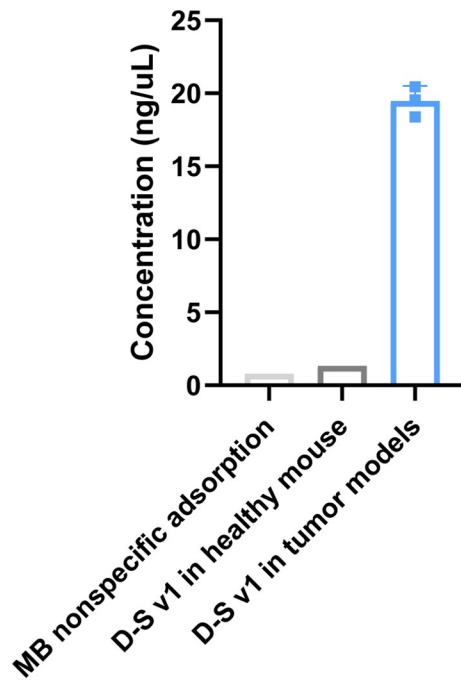

**Fig. S9** RNA concentration measurement for the controls. MB nonspecific adsorption: MB@SA was incubated directly with the serum of a lung cancer mouse model without injection of peptides@biotin. This result indicates that the MB@SA has slight nonspecific adsorption towards the EVs. D-S v1 in healthy mouse: we injected the D-S v1@biotin into a healthy mouse, withdrew its blood at 24 h post injection, and collected the D-S v1@biotin-tagged EVs using MB@SA. This result shows that D-S v1 can hardly capture EVs in the healthy mouse model, suggesting the excellent tumor specificity of this D-S pHLIP system. D-S v1 in tumor models (Fig. 4B in the main text) was used as a reference. The results are expressed as mean  $\pm$  SEM (n = 3 biological replicates).

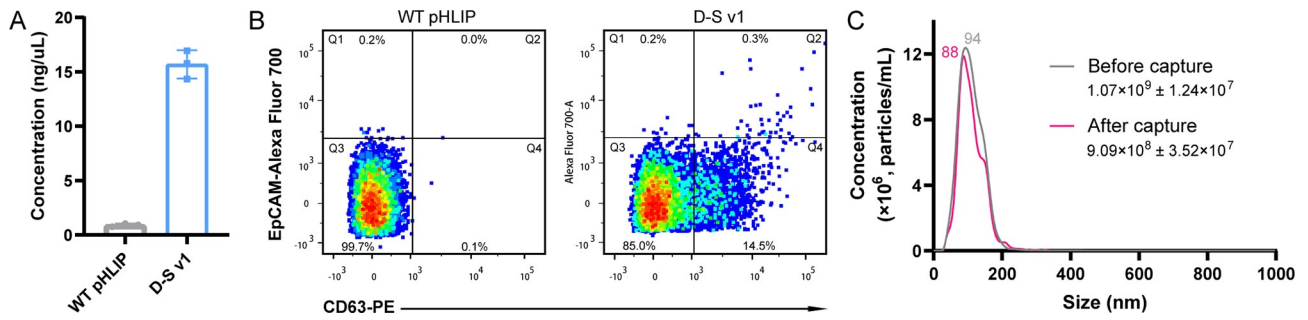

**Fig. S10** Identification of the captured EVs from mice with breast cancer. (A) RNA detection. (B) FCM. (C) NTA. The breast cancer models were built by inoculation of MDA-MB-231. The sera were withdrawn at the optimal time point, i.e., 24 h. The results of (A) indicate that the D-S v1 has captured abundant EVs, while the WT pHLIP did not. In (B), there are significant fluorescence signals of CD63 and EpCAM in the D-S v1 group. These results indicate that the D-S pHLIP system is amenable to the breast cancer model as well. The results are expressed as mean  $\pm$  SEM (n = 3 biological replicates).

Lung cancer mice

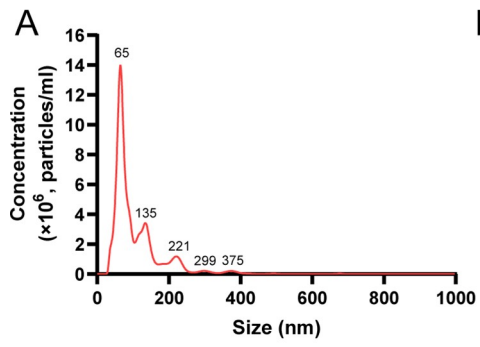

**B**

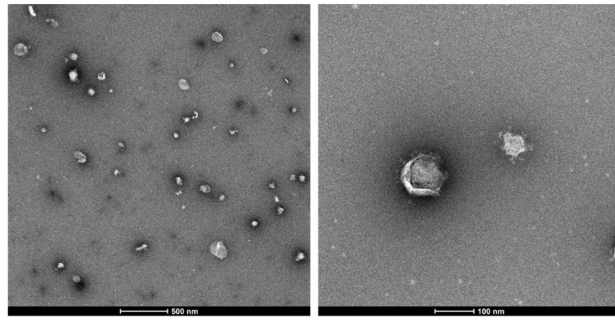

Healthy mice

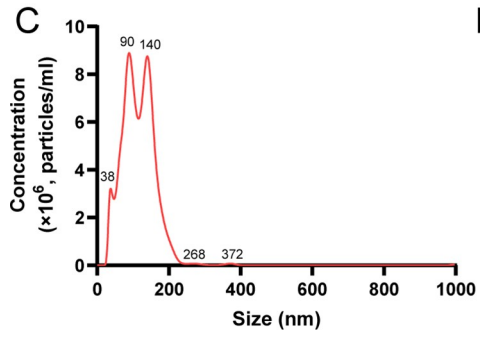

**D**

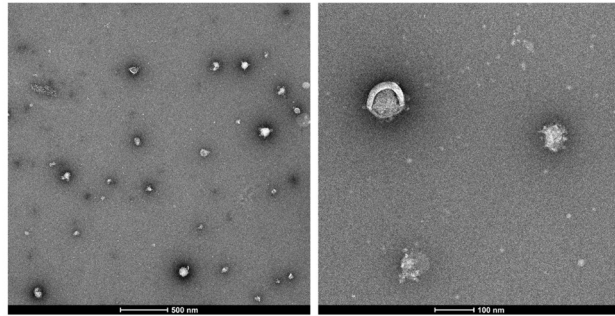

**Fig. S11** NTA and TEM results for the EV samples isolated by UC. (A and B) Lung cancer model. (C and D) Healthy mice.

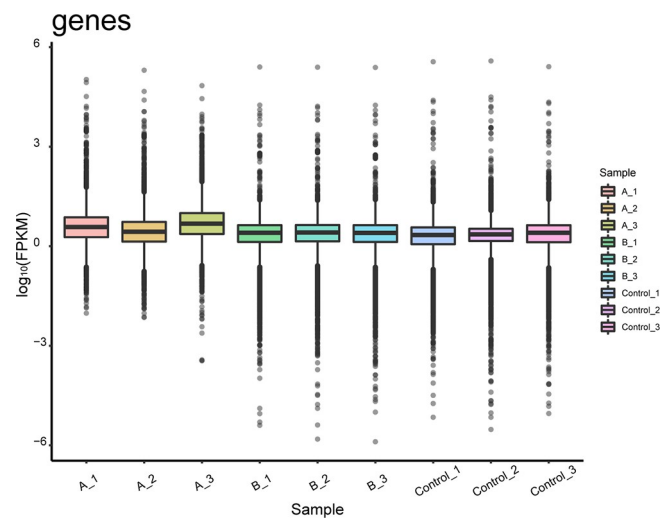

**Fig. S12** Analysis of gene expression levels for EV samples captured by D-S v1 (A1\_3: lung cancer models) and isolated by UC (B1\_3: lung cancer models, and Control 1\_3: healthy mice). These results indicate that the samples have good biological repeatability.

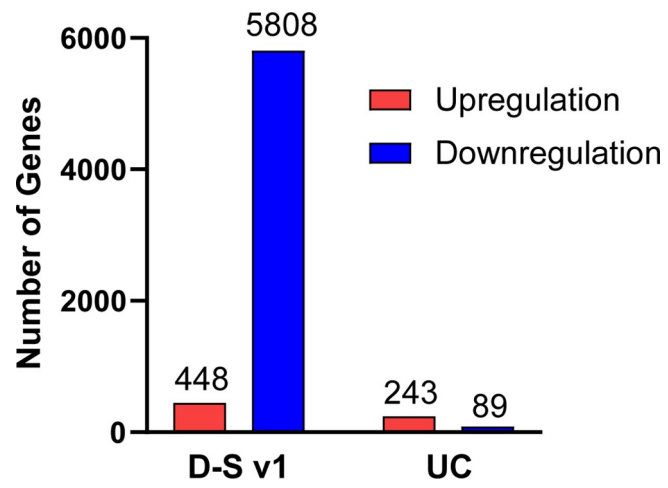

**Fig. S13** DEG numbers in D-S v1 and UC groups, respectively. A false-discovery rate-corrected  $q < 0.05$  and a  $FC > 2$  are used to define upregulation (red) and downregulation (blue), here and in the forthcoming figures.

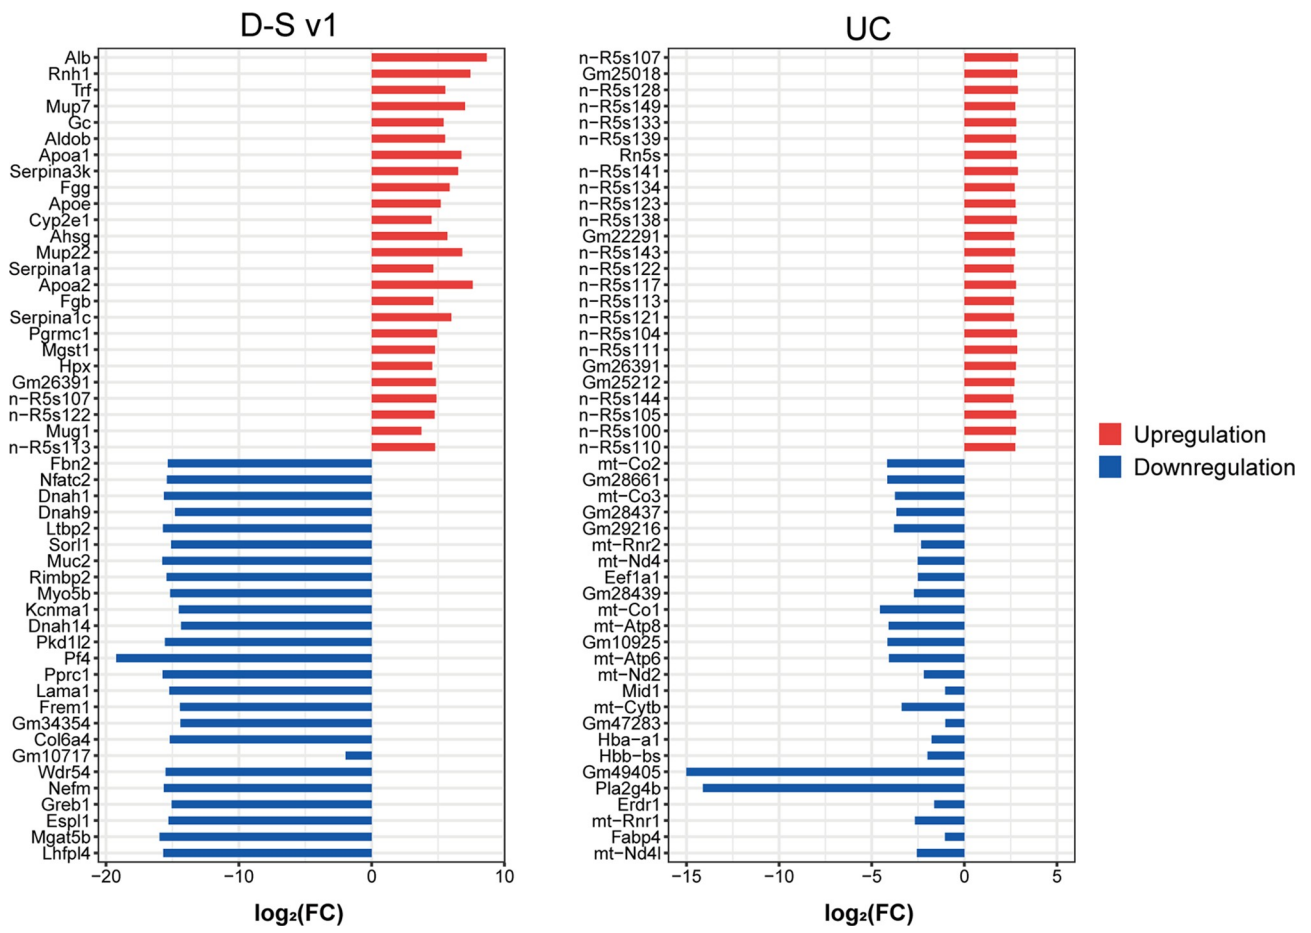

**Fig. S14** Top 50 DEGs in D-S v1 and UC groups, respectively.

A

D-S v1

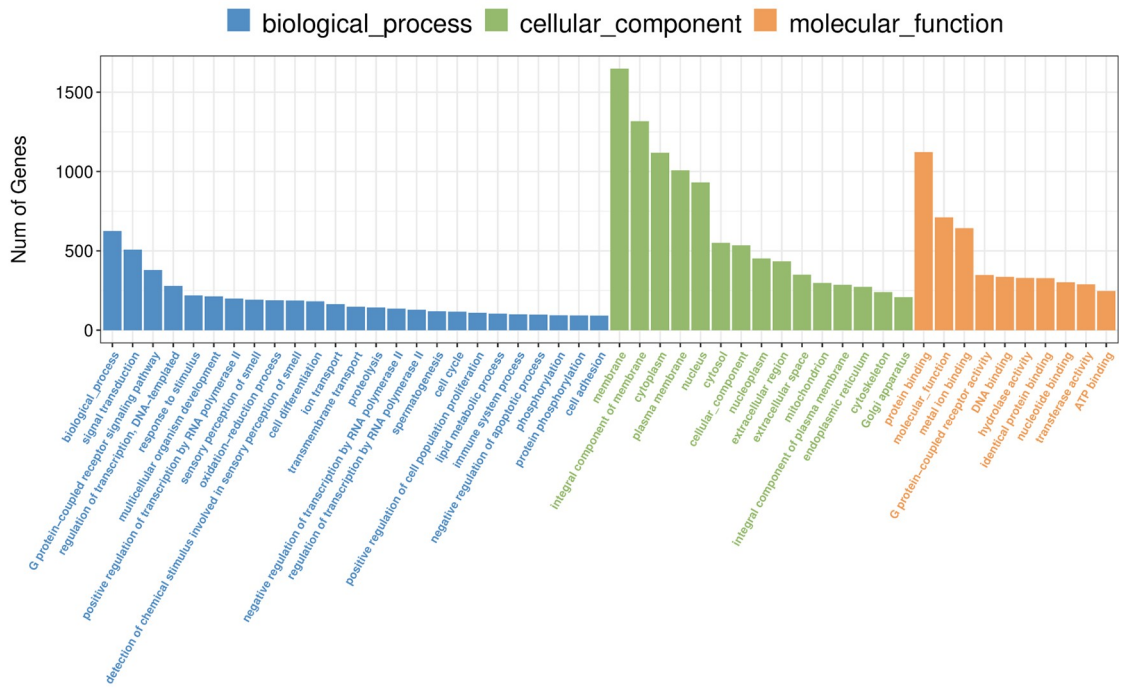

B

UC

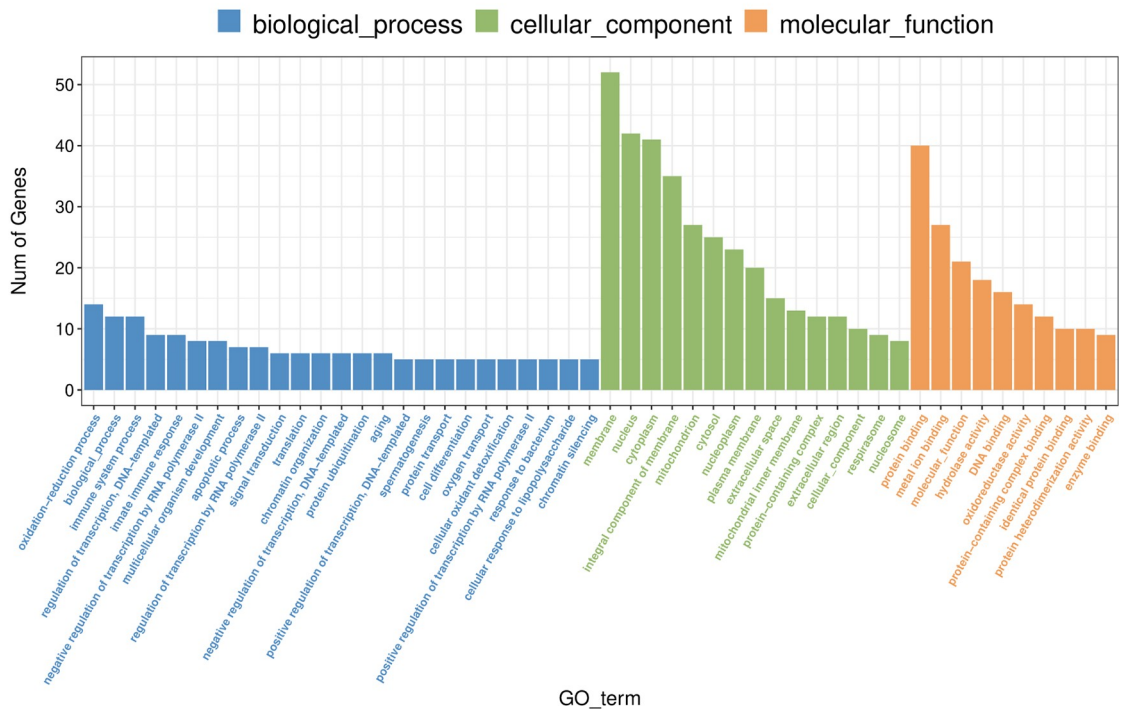

Fig. S15 GO analysis based on the identified DEGs. (A) D-S v1 group. (B) UC group.

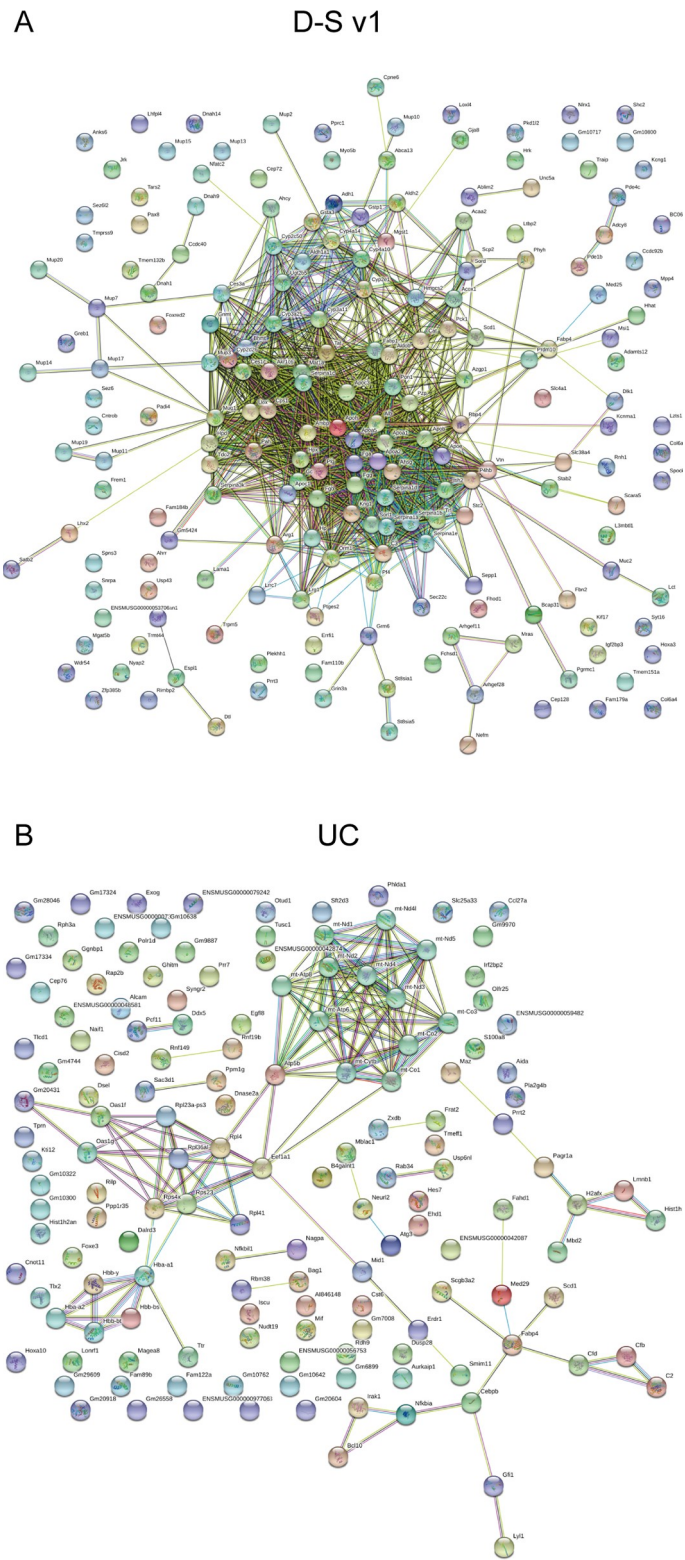

**Fig. S16** Protein-protein interaction network diagrams. (A) D-S v1 group. (B) UC group.



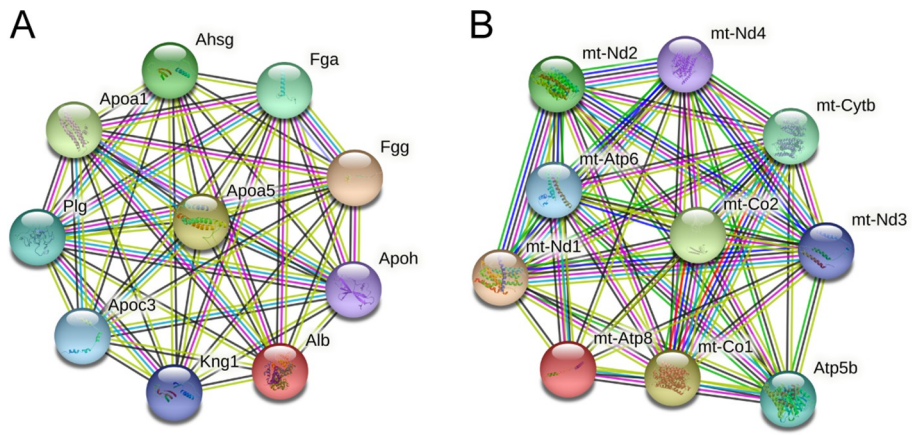

**Fig. S17** Hub genes generated from PPI network. (A) D-S v1 group. (B) UC group.

**Captions for Movies S1 to S2:**

Movie S1: conformational changes of D-S v1 based on its trajectory in 100 ns MD simulation.

Movie S2: conformational changes of D-S v2 based on its trajectory in 100 ns MD simulation.

**Captions for characterization of peptides:**

Analytic characterization of peptides (WT pHLIP, D-S v1, and D-S v2) and functionalized ones (WT pHLIP@biotin, D-S v1@biotin, and D-S v1@Cy5.5) used in this study.

## SI References

1. A. Waterhouse *et al.*, SWISS-MODEL: homology modelling of protein structures and complexes. *Nucleic Acids Res.* **46**, 296-303 (2018).
2. S. Bienert *et al.*, The SWISS-MODEL Repository-new features and functionality. *Nucleic Acids Res.* **45**, D313-d319 (2017).
3. N. Guex, M. C. Peitsch, T. Schwede, Automated comparative protein structure modeling with SWISS-MODEL and Swiss-PdbViewer: a historical perspective. *Electrophoresis* **30**, 162-173 (2009).
4. G. Studer *et al.*, QMEANDisCo-distance constraints applied on model quality estimation. *Bioinformatics (Oxford, England)* **36**, 1765-1771 (2020).
5. M. Bertoni, F. Kiefer, M. Biasini, L. Bordoli, T. Schwede, Modeling protein quaternary structure of homo- and hetero-oligomers beyond binary interactions by homology. *Sci. Rep.* **7**, 10480 (2017).
6. R. Anandkrishnan, B. Aguilar, A. V. Onufriev, H++ 3.0: automating pK prediction and the preparation of biomolecular structures for atomistic molecular modeling and simulations. *Nucleic Acids Res.* **40**, W537-541 (2012).
7. J. Myers, G. Grothaus, S. Narayanan, A. Onufriev, A simple clustering algorithm can be accurate enough for use in calculations of pKs in macromolecules. *Proteins* **63**, 928-938 (2006).
8. J. C. Gordon *et al.*, H++: a server for estimating pKas and adding missing hydrogens to macromolecules. *Nucleic Acids Res.* **33**, W368-371 (2005).
9. B. C. Knott, M. F. Crowley, M. E. Himmel, J. Ståhlberg, G. T. Beckham, Carbohydrate-protein interactions that drive processive polysaccharide translocation in enzymes revealed from a computational study of cellobiohydrolase processivity. *J. Am. Chem. Soc.* **136**, 8810-8819 (2014).
10. Z. Zong *et al.*, Lysine Mutation of the Claw-Arm-Like Loop Accelerates Catalysis by Cellobiohydrolases. *J. Am. Chem. Soc.* **141**, 14451-14459 (2019).
11. E. Hatcher, O. Guvench, A. D. Mackerell, Jr., CHARMM Additive All-Atom Force Field for Acyclic Polyalcohols, Acyclic Carbohydrates and Inositol. *J. Chem. Theory Comput.* **5**, 1315-1327 (2009).
12. K. Vanommeslaeghe *et al.*, CHARMM general force field: A force field for drug-like molecules compatible with the CHARMM all-atom additive biological force fields. *J. Comput. Chem.* **31**, 671-690 (2010).
13. O. Guvench *et al.*, Additive empirical force field for hexopyranose monosaccharides. *J. Comput. Chem.* **29**, 2543-2564 (2008).
14. O. Guvench, E. R. Hatcher, R. M. Venable, R. W. Pastor, A. D. Mackerell, CHARMM Additive All-Atom Force Field for Glycosidic Linkages between Hexopyranoses. *J. Chem. Theory Comput.* **5**, 2353-2370 (2009).
15. W. L. Jorgensen, J. Chandrasekhar, J. D. Madura, R. W. Impey, M. L. Klein, Comparison of simple potential functions for simulating liquid water. *J. Chem. Phys.* **79**, 926-935 (1983).
16. W. Humphrey, A. Dalke, K. Schulten, VMD: visual molecular dynamics. *J. Mol. Graph.* **14**, 33-38 (1996).
17. H. Fu, X. Shao, W. Cai, C. Chipot, Taming Rugged Free Energy Landscapes Using an Average Force. *Acc. Chem. Res.* **52**, 3254-3264 (2019).
18. M. An, D. Wijesinghe, O. A. Andreev, Y. K. Reshetnyak, D. M. Engelman, pH-(low)-insertion-peptide (pHLIP) translocation of membrane impermeable phalloidin toxin inhibits cancer cell proliferation. *Proc. Natl. Acad. Sci. U.S.A.* **107**, 20246-20250 (2010).
19. O. A. Andreev *et al.*, Mechanism and uses of a membrane peptide that targets tumors and other acidic tissues in vivo. *Proc. Natl. Acad. Sci. U.S.A.* **104**, 7893-7898 (2007).
20. P. Shannon *et al.*, Cytoscape: a software environment for integrated models of biomolecular interaction networks. *Genome Res.* **13**, 2498-2504 (2003).

# HPLC REPORT

Product Name: WT pHLIP  
Instrument No: 0200194  
Lot No : P210819-CL341357  
Column : 4.6\*250mm C18  
Solvent A : 0.1%Trifluoroacetic in 100% Acetonitrile  
Solvent B : 0.1%Trifluoroacetic in 100% Water  
Gradient :  
          0.01min 45% 55%  
          25min 70% 30%  
          25.01min 100% 0%  
          30.0min STOP

Flow rate :1.0ml/min

Wavelength :220nm

Volume: 10µl

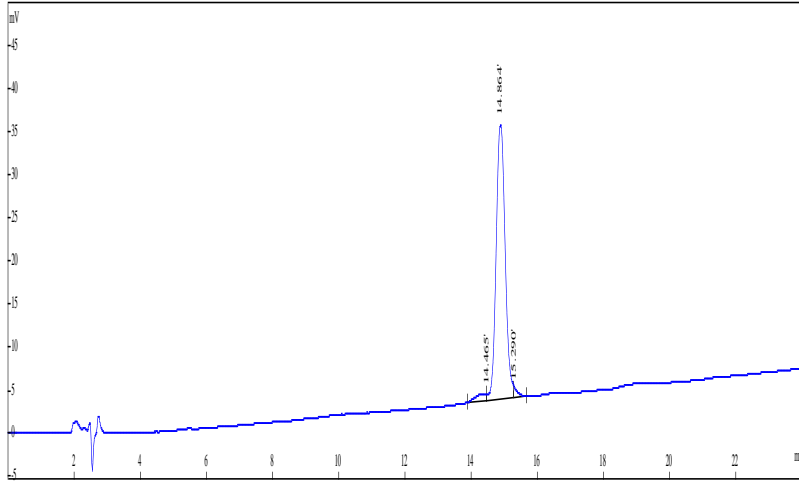

| Rank  | Time   | Name | Conc. | Area   | Height |
|-------|--------|------|-------|--------|--------|
| 1     | 14.465 |      | 2.883 | 17212  | 683    |
| 2     | 14.864 |      | 95.86 | 572254 | 31758  |
| 3     | 15.290 |      | 1.257 | 7503   | 1016   |
| Total |        |      | 100   | 596969 | 33457  |

# MASS SPECTROMETRY REPORT

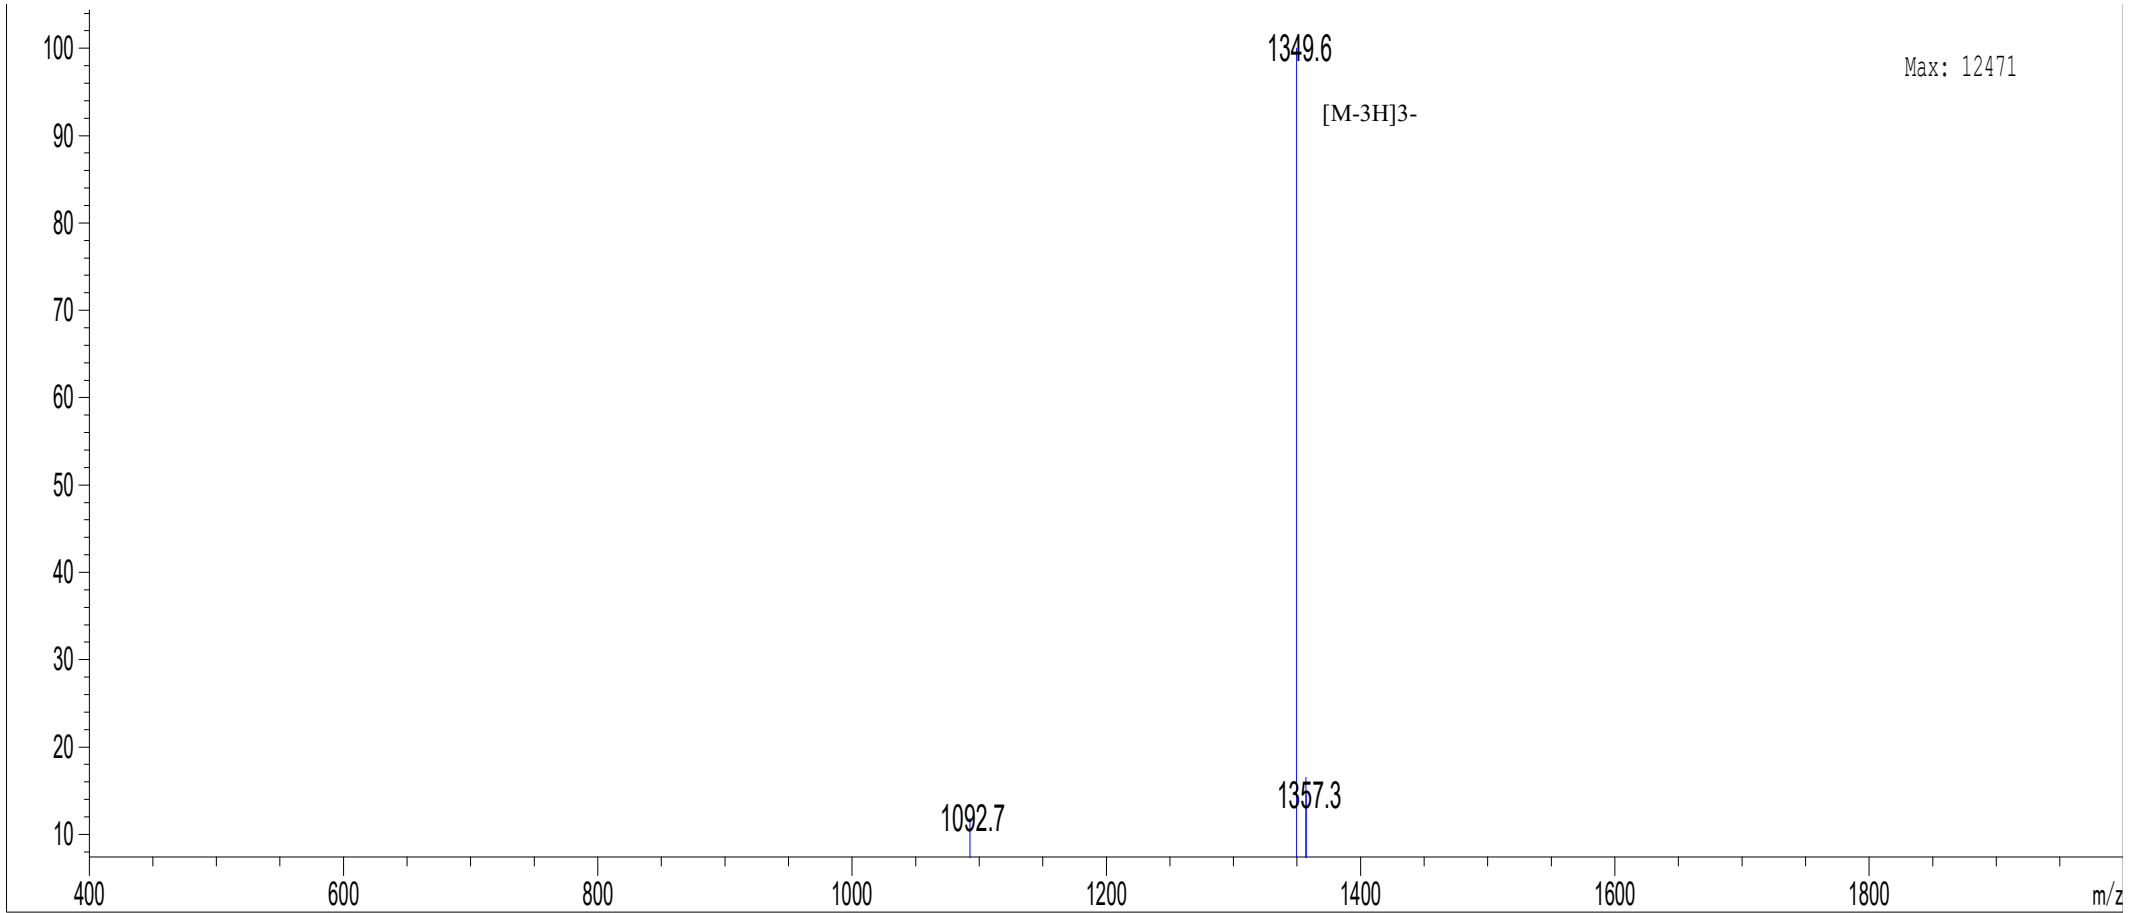

## Sample Description

Analyzed date: 2021-09-02  
Analyst: YU  
Sample: WT pHLIP  
M.W.: 4051.99  
Lot. No.: P210819-CL341357

## Instrument

Agilent-6125B  
Probe: ESI  
Nebulizer Gas Flow: 1.5L/min  
CDL: -20.0v  
CDL Temp.: 250 °C  
Block Temp.: 200 °C

Probe Bias: +4.5kv  
Detector: 1.5kv  
T. Flow: 0.2ml/min  
B. Conc.: 50%H2O/50%ACN

# HPLC REPORT

Product Name :L28H/D31A/L21F/L22G(D-S v1)  
 Lot No :P210223-SJ872141  
 Column :Gemini-NX 5  $\mu$  C18 110A, 4.6\*250mm  
 Solvent A :0.1%Trifluoroacetic in 100% Acetonitrile  
 Solvent B :0.1%Trifluoroacetic in 100% Water  
 Gradient :           A                    B  
           0.01min   20%               80%  
           25min     80%               20%  
           25.01min 100%              0%  
           30min                        Stop  
 Flow rate    :1.0ml/min  
 Wavelength  :220nm  
 Volume      :20ul

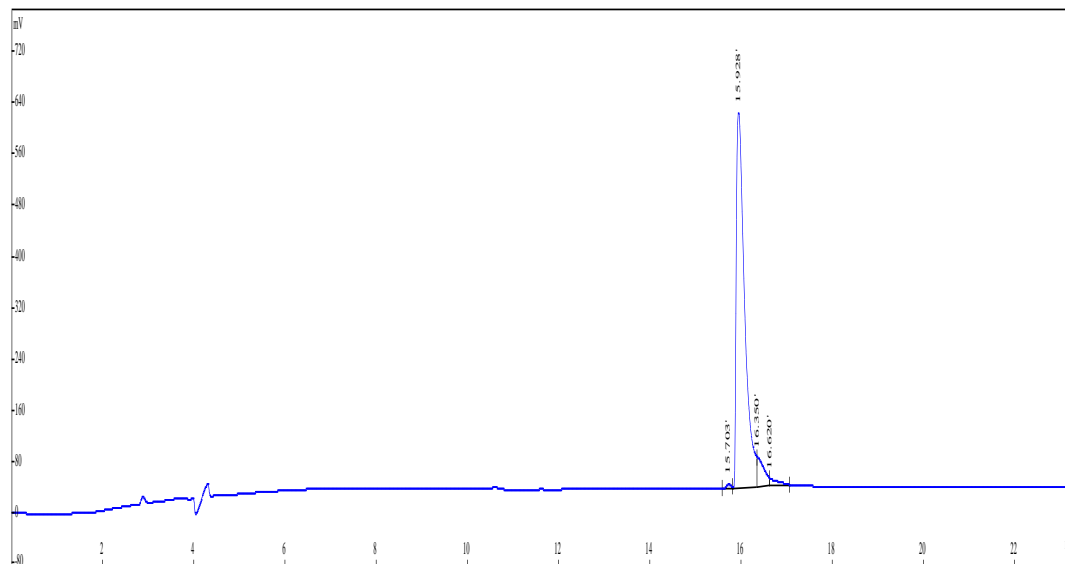

| Rank  | Time   | Conc.   | Area    | Height |
|-------|--------|---------|---------|--------|
| 1     | 15.703 | 0.4325  | 33207   | 5700   |
| 2     | 15.928 | 92.4244 | 7095710 | 584222 |
| 3     | 16.350 | 5.5295  | 424514  | 43950  |
| 4     | 16.620 | 1.6136  | 123882  | 10799  |
| Total |        | 100     | 7677313 | 644671 |

# MASS SPECTROMETRY REPORT

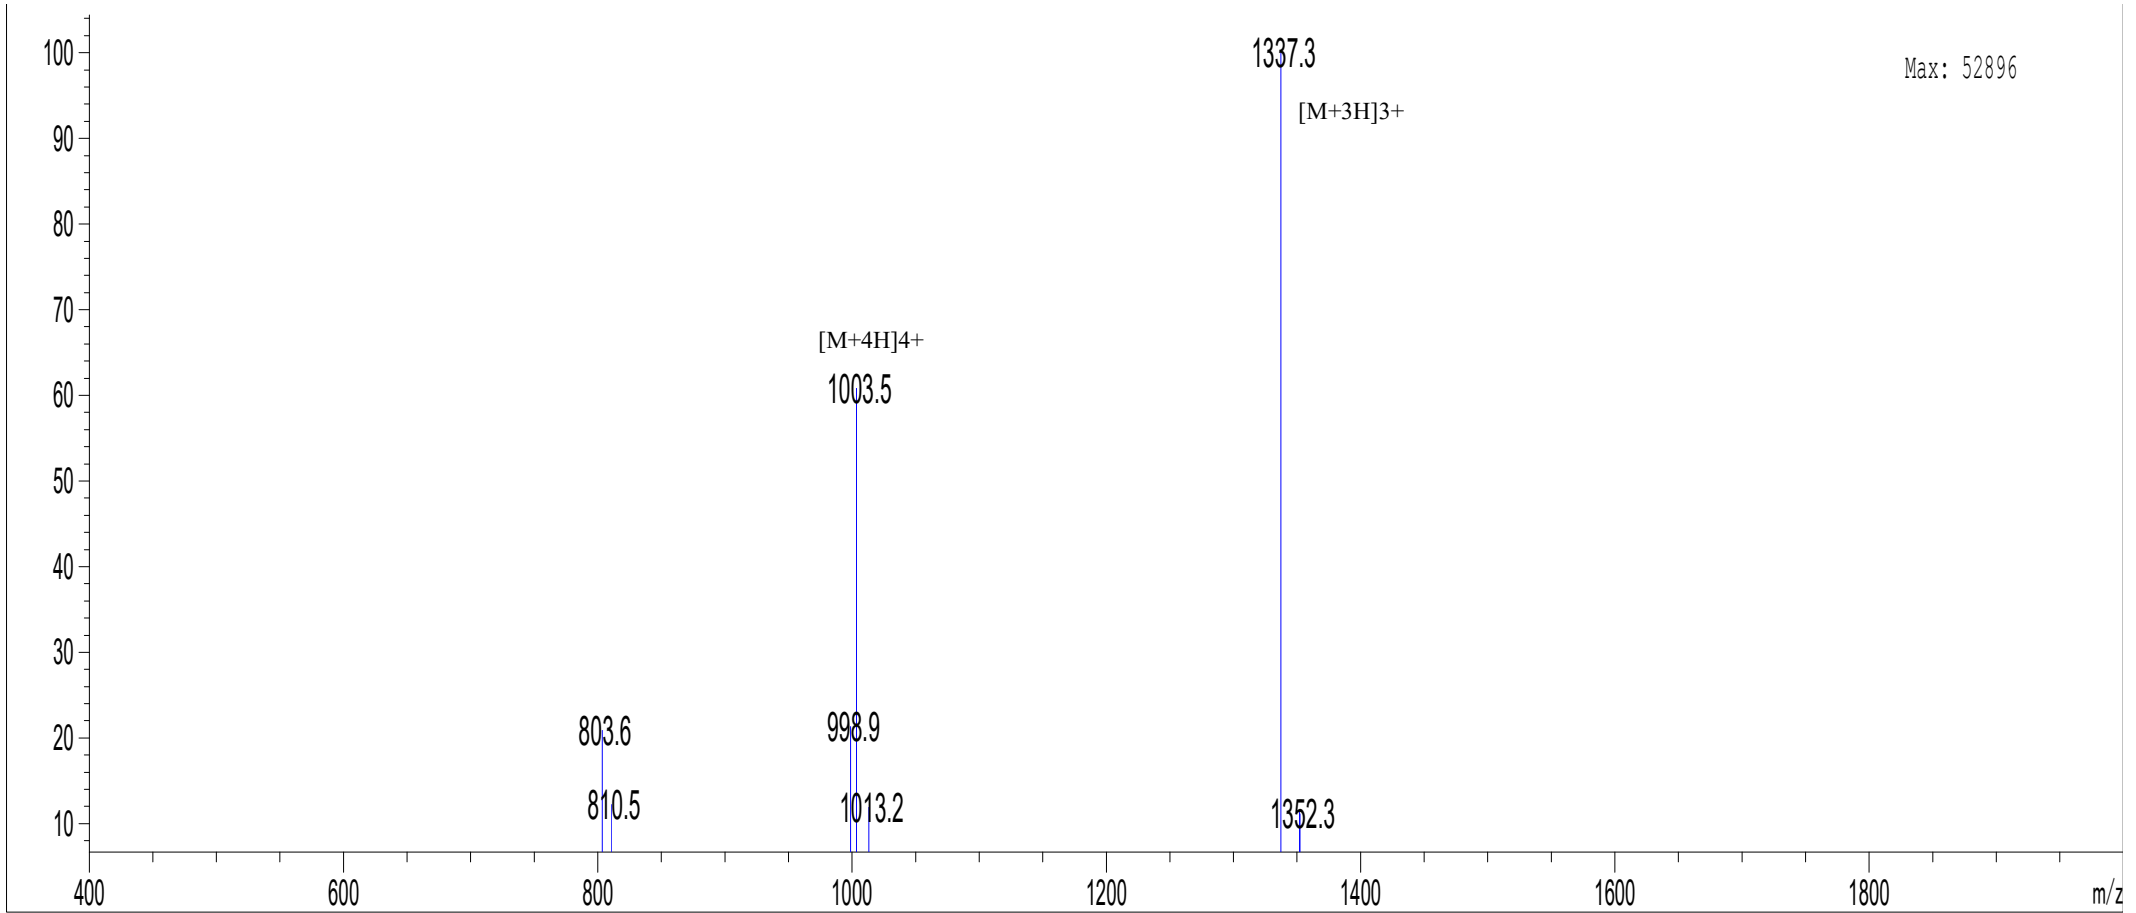

## Sample Description

Analyzed date: 2021-03-05  
Analyst: YU  
Sample: L28H/D31A/L21F/L22G (D-S v1)  
M.W.: 4009.38  
Lot. No.: P210223-SJ872141

## Instrument

Agilent-6125B  
Probe: ESI  
Nebulizer Gas Flow: 1.5L/min  
CDL: -20.0v  
CDL Temp.: 250 °C  
Block Temp.: 200 °C

Probe Bias: +4.5kv  
Detector: 1.5kv  
T. Flow: 0.2ml/min  
B. Conc.: 50%H<sub>2</sub>O/50%ACN

# HPLC REPORT

Product Name :L28H/D31A/L21F/L22G/T18H(D-S v2)  
 Lot No :P210223-SJ872142  
 Column :Gemini-NX 5  $\mu$  C18 110A, 4.6\*250mm  
 Solvent A :0.1%Trifluoroacetic in 100% Acetonitrile  
 Solvent B :0.1%Trifluoroacetic in 100% Water  
 Gradient :           A                           B  
           0.01min   30%                       70%  
           25min     90%                       10%  
           25.01min 100%                      0%  
           30min                                Stop  
 Flow rate :1.0ml/min  
 Wavelength :220nm  
 Volume :20ul

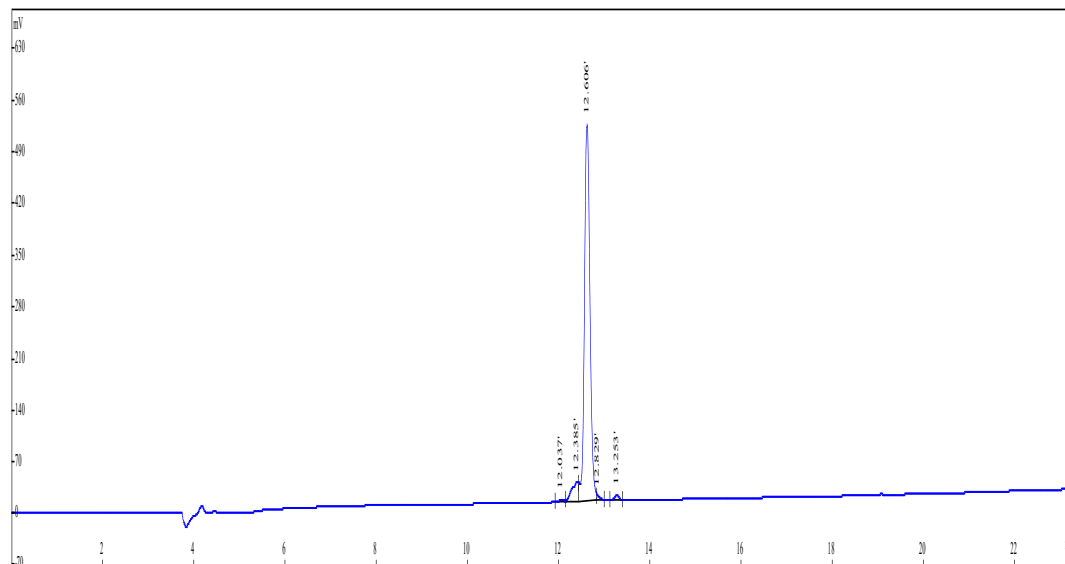

| Rank  | Time   | Conc.   | Area    | Height |
|-------|--------|---------|---------|--------|
| 1     | 12.037 | 0.5116  | 21871   | 3004   |
| 2     | 12.385 | 6.7703  | 289443  | 26215  |
| 3     | 12.606 | 91.3594 | 3905793 | 508415 |
| 4     | 12.829 | 0.4845  | 20712   | 5785   |
| 5     | 13.253 | 0.8742  | 37374   | 5939   |
| Total |        | 100     | 4275193 | 549358 |



# MASS SPECTROMETRY REPORT

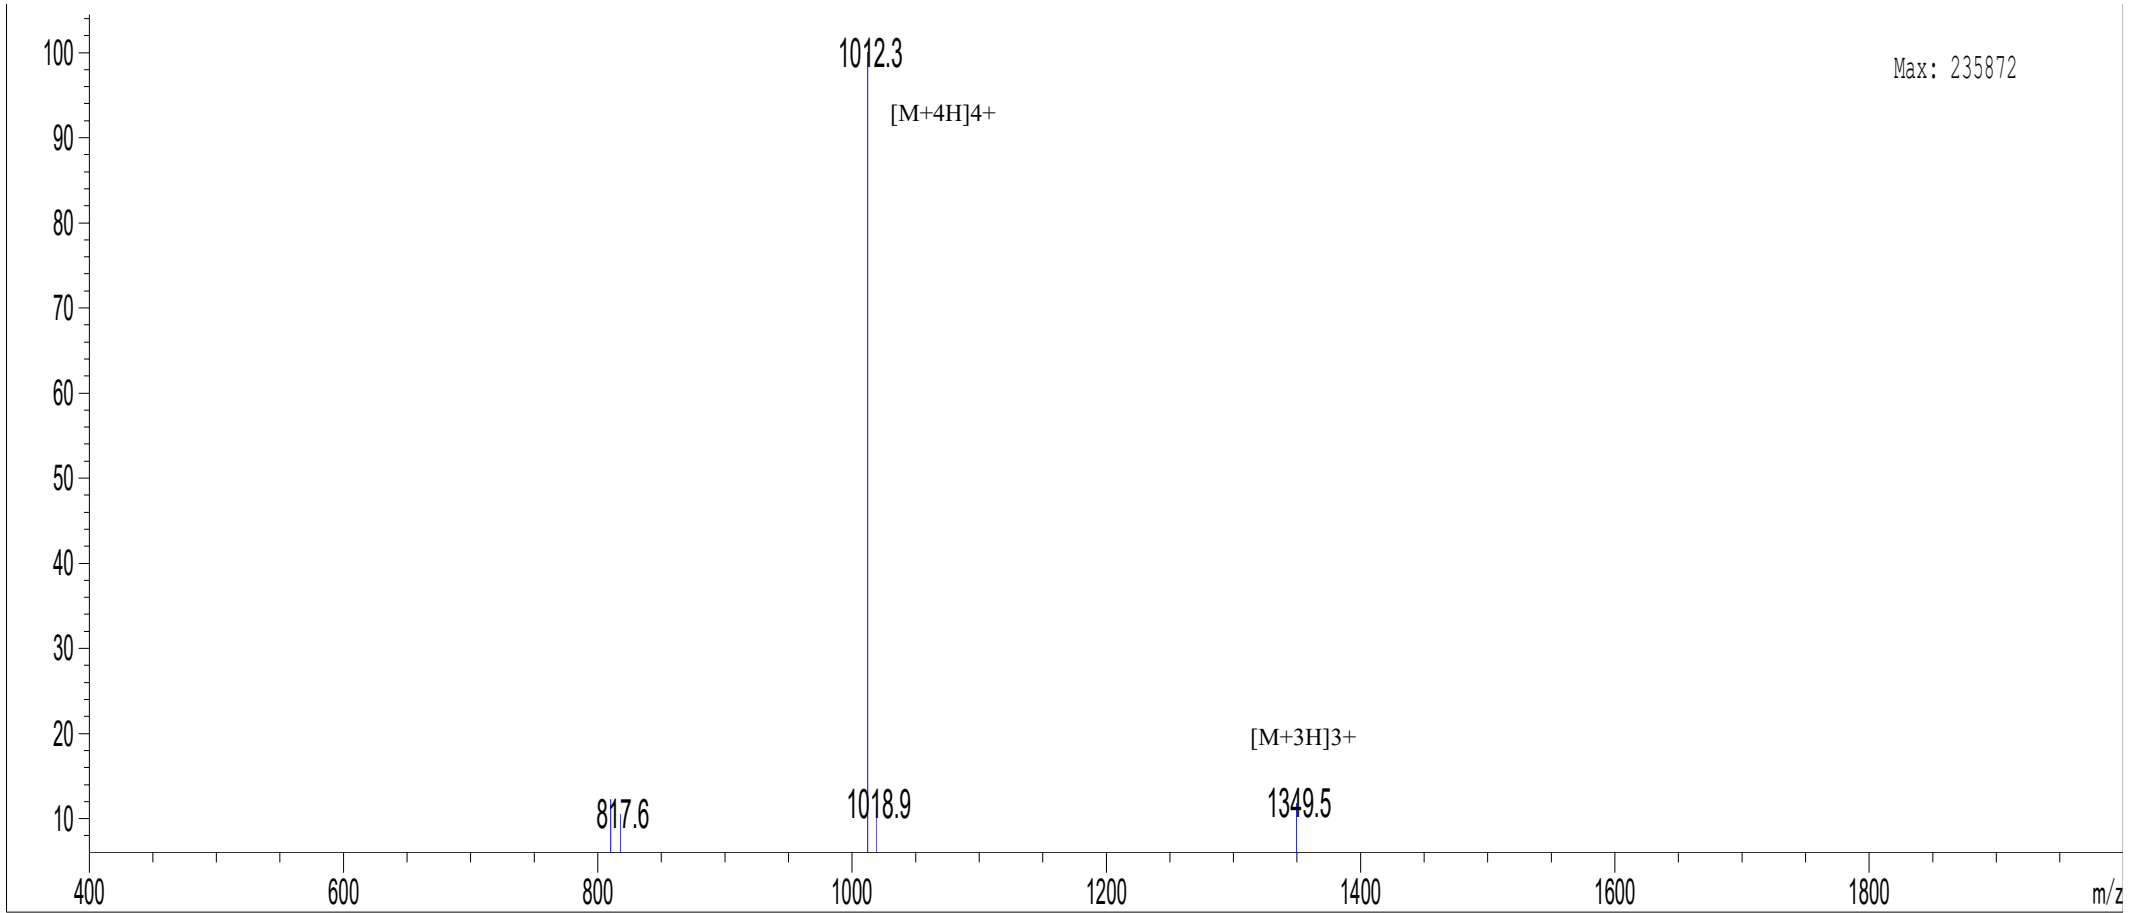

Max: 235872

## Sample Description

Analyzed date: 2021-03-09  
Analyst: YU  
Sample: L28H/D31A/L21F/L22G/T18H (D-S v2)  
M.W.: 4045.42  
Lot. No.: P210223-SJ872142

## Instrument

Instrument: Agilent-6125B  
Probe: ESI  
Nebulizer Gas Flow: 1.5L/min  
CDL: -20.0v  
CDL Temp.: 250 °C  
Block Temp.: 200 °C

Probe Bias: +4.5kv  
Detector: 1.5kv  
T. Flow: 0.2ml/min  
B. Conc.: 50%H2O/50%ACN

# HPLC REPORT

Product Name :WT pHLP@biotin  
Lot No :P201110-HS828717  
Column :Gemini-NX 5  $\mu$  C18 110A, 4.6\*250mm  
Solvent A :0.1%Trifluoroacetic in 100% Acetonitrile  
Solvent B :0.1%Trifluoroacetic in 100% Water  
Gradient :           A           B  
          0.01min  30%       70%  
          25min   90%       10%  
          25.01min 100%      0%  
          30min                Stop  
Flow rate :1.0ml/min  
Wavelength :220nm  
Volume :20ul

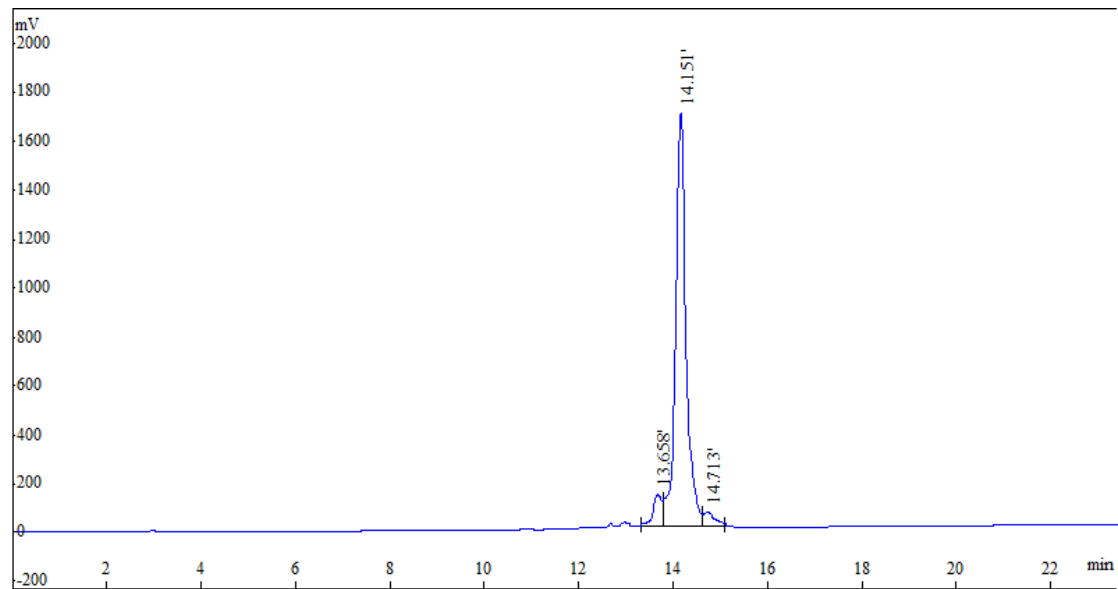

| Rank  | Time   | Conc.   | Area     | Height  |
|-------|--------|---------|----------|---------|
| 1     | 13.658 | 5.8226  | 1572138  | 122694  |
| 2     | 14.151 | 91.3272 | 24658992 | 1680803 |
| 3     | 14.713 | 2.8502  | 769568   | 50015   |
| Total |        | 100     | 27000698 | 1853512 |

# MASS SPECTROMETRY REPORT

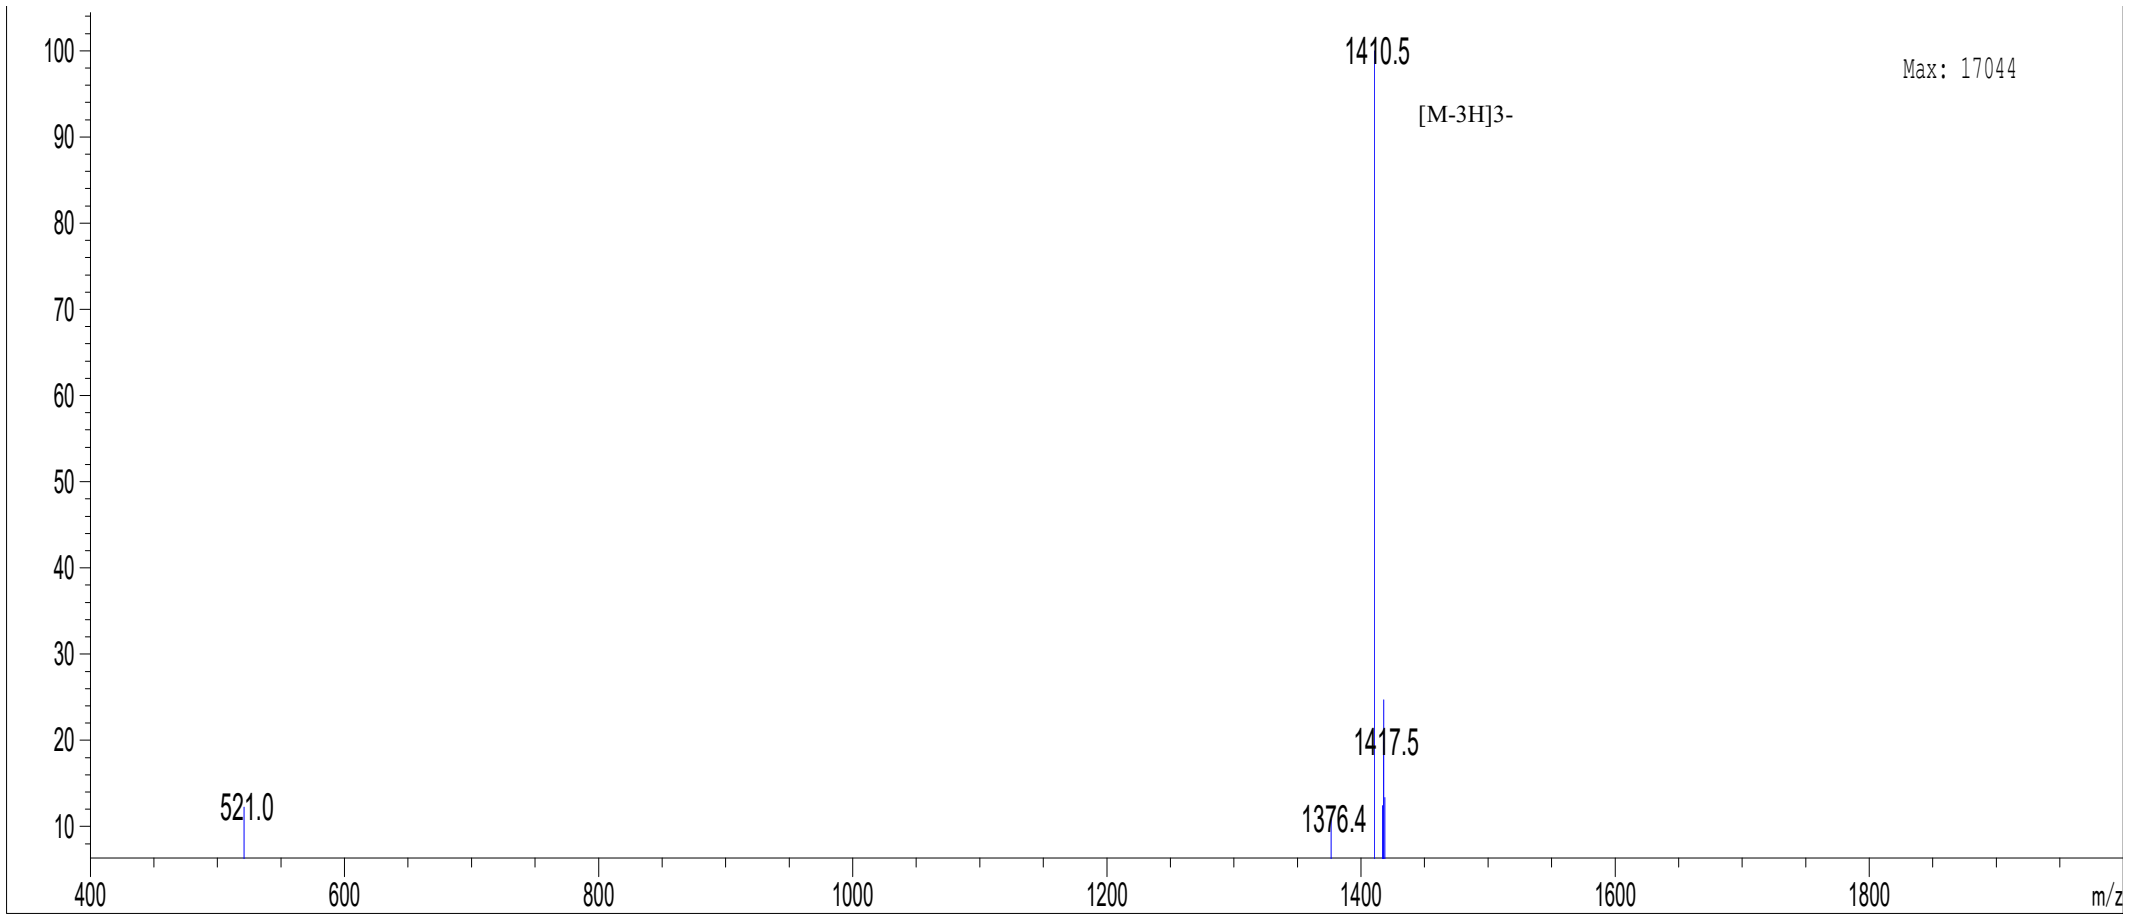

## Sample Description

Analyzed date: 2020-11-24  
Analyst: YU  
Sample: WT pHLIP@biotin  
M.W.: 4234.77  
Lot. No.: P201110-HS828717

## Instrument

Agilent-6125B  
Probe: ESI  
Nebulizer Gas Flow: 1.5L/min  
CDL: -20.0v  
CDL Temp.: 250 °C  
Block Temp.: 200 °C

Probe Bias: +4.5kv  
Detector: 1.5kv  
T. Flow: 0.2ml/min  
B. Conc.: 50%H2O/50%ACN

# HPLC REPORT

Product Name :D-S v1@biotin  
Lot No :P210407-HS886800  
Column :Gemini-NX 5  $\mu$  C18 110A, 4.6\*250mm  
Solvent A :0.1%Trifluoroacetic in 100% Acetonitrile  
Solvent B :0.1%Trifluoroacetic in 100% Water  
Gradient :           A           B  
          0.01min 30%       70%  
          25min 90%       10%  
          25.01min 100%      0%  
          30min               Stop  
Flow rate :1.0ml/min  
Wavelength :220nm  
Volume :20ul

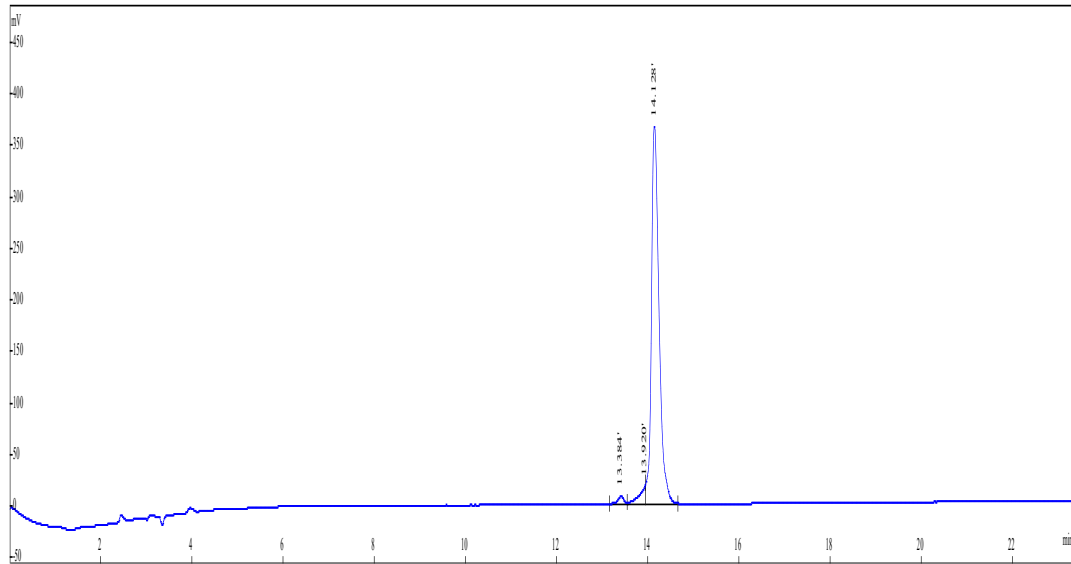

| Rank  | Time   | Conc.   | Area    | Height |
|-------|--------|---------|---------|--------|
| 1     | 13.384 | 1.3444  | 56097   | 6811   |
| 2     | 13.920 | 4.0139  | 167488  | 16590  |
| 3     | 14.128 | 94.6417 | 3949156 | 364934 |
| Total |        | 100     | 4172741 | 388335 |

# MASS SPECTROMETRY REPORT

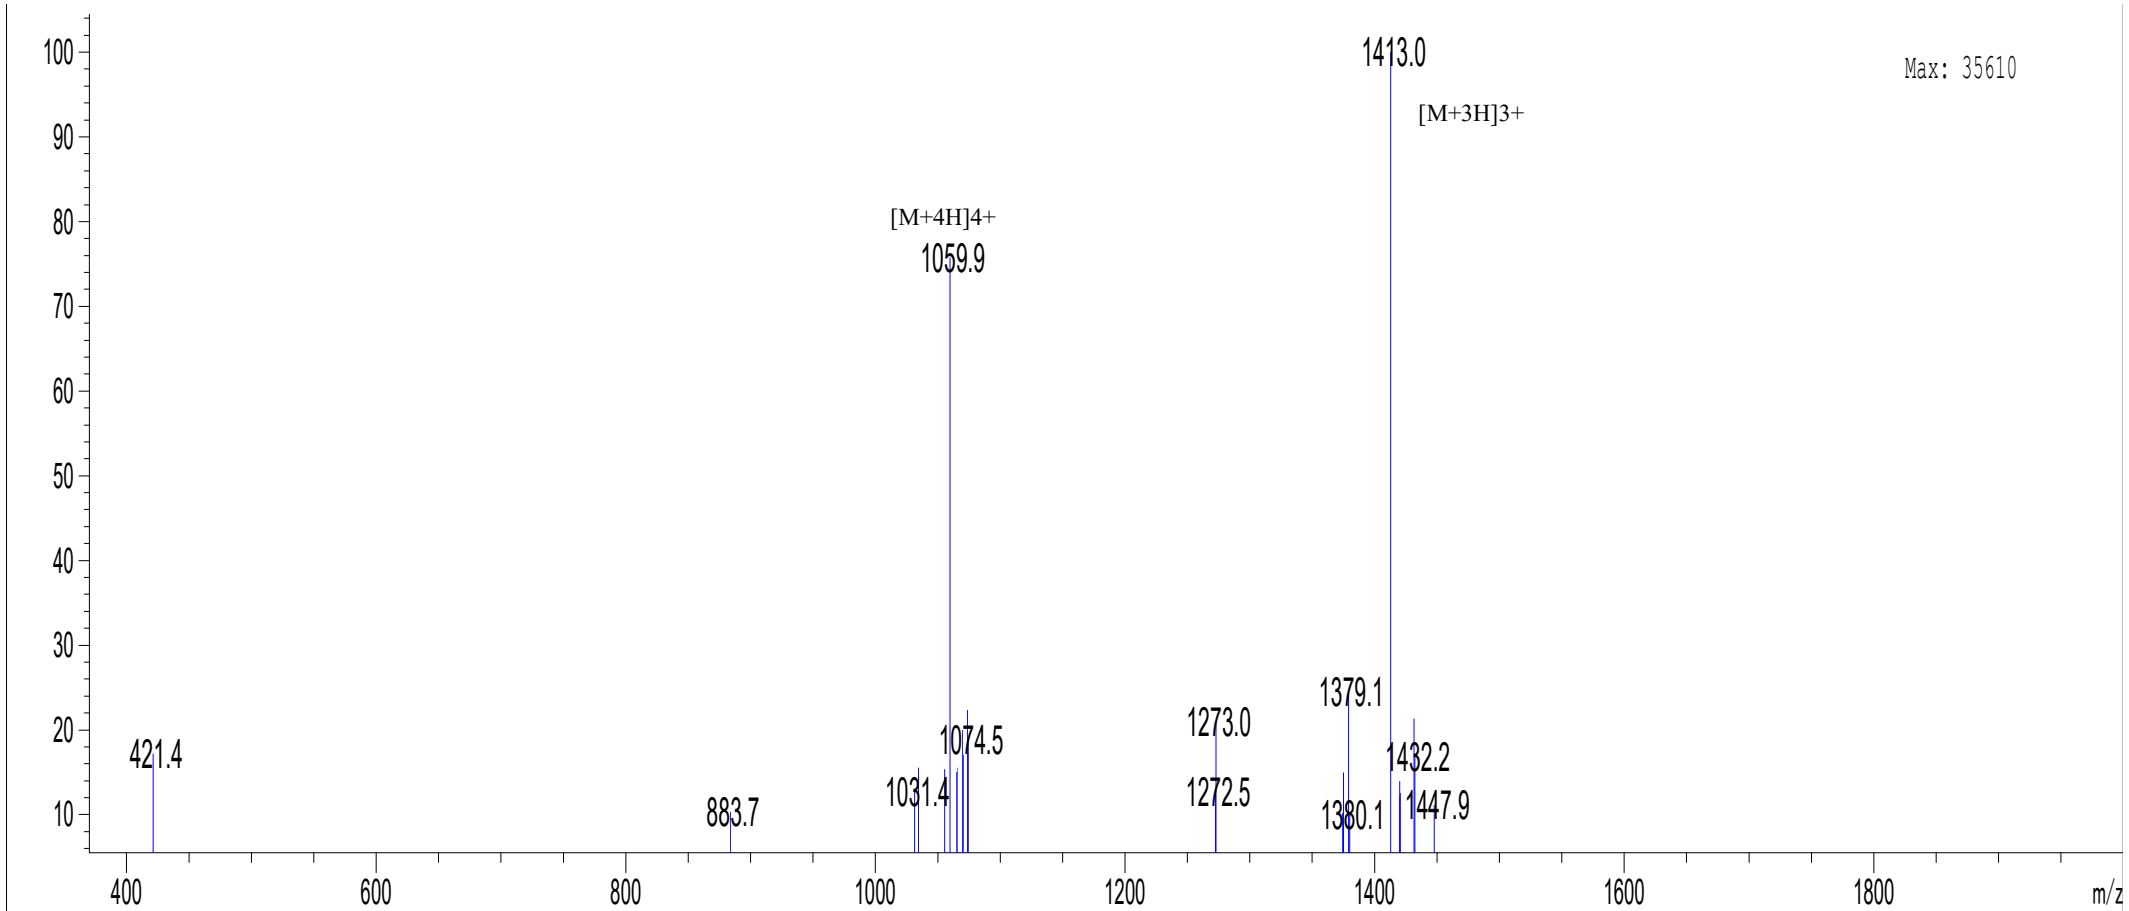

## Sample Description

Analyzed date: 2021-04-20  
Analyst: YU  
Sample: D-S v1@biotin  
M.W.: 4235.68  
Lot. No.: P210407-HS886800

## Instrument

Instrument: Agilent-6125B  
Probe: ESI  
Nebulizer Gas Flow: 1.5L/min  
CDL: -20.0v  
CDL Temp.: 250 °C  
Block Temp.: 200 °C

Probe Bias: +4.5kv  
Detector: 1.5kv  
T. Flow: 0.2ml/min  
B. Conc.: 50%H2O/50%ACN

# HPLC REPORT

Product Name : D-S v1@Cy5. 5  
 Lot No : P210906-HS931414  
 Column : YMC-Pack C4 4.6mm\*250mm, 5µm 30mm  
 Solvent A : 0.1%Trifluoroacetic in 100% Acetonitrile  
 Solvent B : 0.1%Trifluoroacetic in 100% Water  
 Gradient :           A                    B  
           0.01min   30%                70%  
           25min     90%                10%  
           25.01min 100%               0%  
           30min                        Stop  
 Flow rate : 1.0ml/min  
 Wavelength : 220nm  
 Volume : 20ul

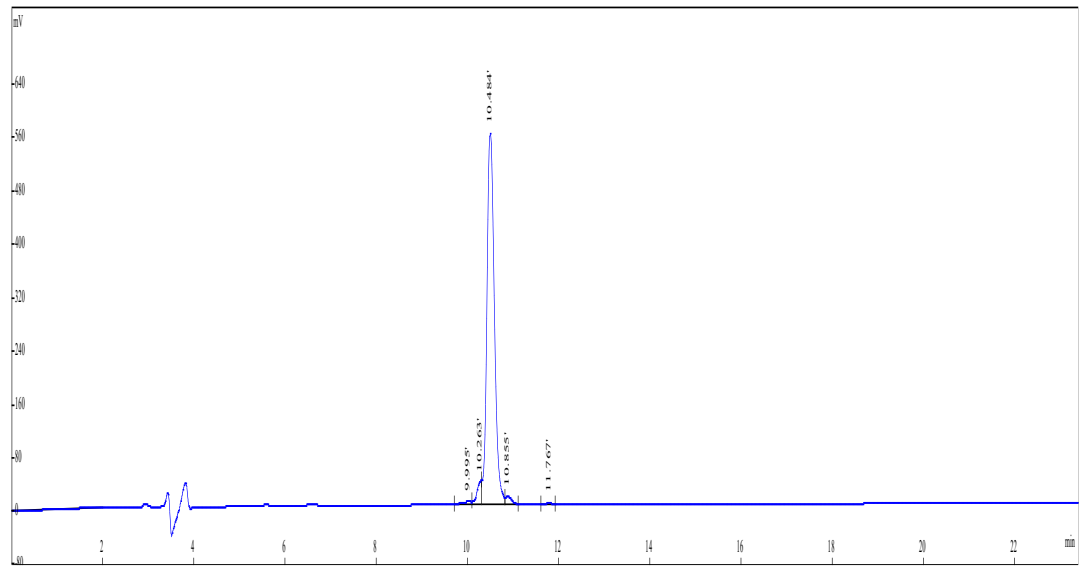

| Rank  | Time   | Conc.   | Area    | Height |
|-------|--------|---------|---------|--------|
| 1     | 9.995  | 0.9198  | 58304   | 4460   |
| 2     | 10.263 | 4.0839  | 258876  | 34281  |
| 3     | 10.484 | 93.2430 | 5910569 | 554044 |
| 4     | 10.855 | 1.4372  | 91105   | 11420  |
| 5     | 11.767 | 0.3161  | 20038   | 2463   |
| Total |        | 100     | 6338892 | 606668 |

# MASS SPECTROMETRY REPORT

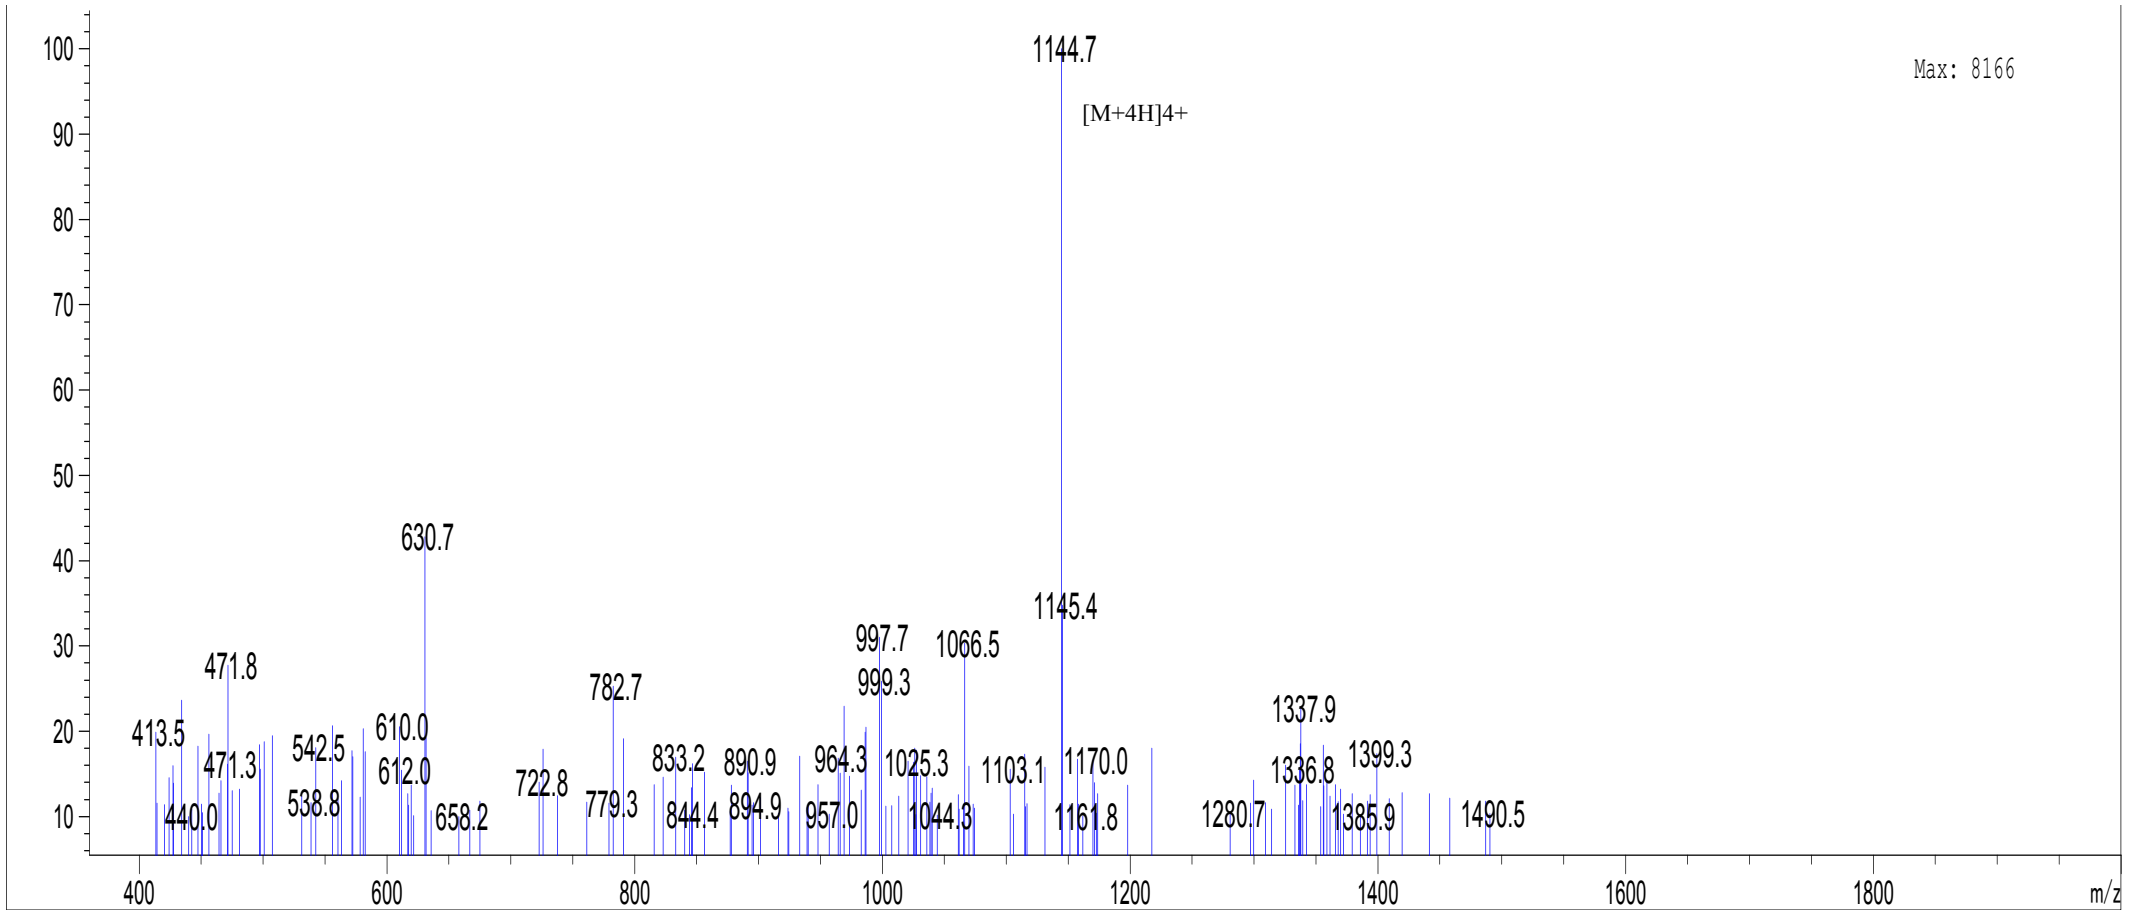

**Sample Description**

Analyzed date: 2021-09-26  
 Analyst: YU  
 Sample: D-S v1@Cy5.5  
 M.W.: 4575.23  
 Lot. No.: P210906-HS931414

**Instrument**

Agilent-6125B  
 Probe: ESI  
 Nebulizer Gas Flow: 1.5L/min  
 CDL: -20.0v  
 CDL Temp.: 250 °C  
 Block Temp.: 200 °C

Probe Bias: +4.5kv  
 Detector: 1.5kv  
 T. Flow: 0.2ml/min  
 B. Conc.: 50%H2O/50%ACN
